# Supplementary material for: SARS-CoV-2 Infections in mRNA Vaccinated Individuals are Biased for Viruses Encoding Spike E484K and Associated with Reduced Infectious Virus Loads that Correlate with Respiratory Antiviral IgG levels
Source: PubMed Central journal article supplement — medRxiv. 2021 Jul 7:2021.07.05.21259105. Preprint. [Version 1] doi: 10.1101/2021.07.05.21259105 (PMC8282117; doi:10.1101/2021.07.05.21259105), 2021-07-07
Supplement: media-1.pdf [file media-1.pdf]

Suppl. Table 1

| HPID    | Clade       | Lineage   | % coverage | Depth  | IgG (OD) | E ORF1ab ( | PE N Ct  | ter 2nd Vaccin | Symptoms | Days to CPE |
|---------|-------------|-----------|------------|--------|----------|------------|----------|----------------|----------|-------------|
| HP04818 | 20I/501Y.V1 | B.1.1.7   | 99.60      | 426.21 | 2.36     | 22.88      | 16.75    | 85             | no       | negative    |
| HP05815 | 20I/501Y.V1 | B.1.1.7   | 99.60      | 428.57 | 1.12     | 22.62      | 22.08    | 99             | yes      | negative    |
| HP05816 | 20C         | B.1.526   | 99.60      | 429.57 | 6.54     | 21.25      | 21.41    | 7              | yes      | negative    |
| HP03729 | 20I/501Y.V1 | B.1.1.7   | 99.60      | 445.19 | 1.73     | 16.74      | 15.73    | 38             | yes      | negative    |
| HP03775 | 20I/501Y.V1 | B.1.1.7   | 99.60      | 449.04 | 1.92     | 18.74      | 18.82    | 44             | yes      | 5           |
| HP03786 | 20I/501Y.V1 | B.1.1.7   | 99.60      | 392.08 | 1.82     | 19.12      | 19.27    | 54             | no       | negative    |
| HP04129 | 20I/501Y.V1 | B.1.1.7   | 99.60      | 443.65 | 2.24     | 24.22      | 24.12    | 65             | yes      | negative    |
| HP04153 | 20I/501Y.V1 | B.1.1.7   | 99.60      | 447.43 | 1.98     | 19.82      | 19.51    | 36             | yes      | negative    |
| HP04182 | 20I/501Y.V1 | B.1.1.7   | 99.60      | 438.17 | 0.65     | 24.47      | 24.44    | 27             | yes      | negative    |
| HP04113 | 20C         | B.1.526   | 99.60      | 446.86 | 1.20     | 20.02      | 19.87    | 65             | yes      | negative    |
| HP04414 | 20I/501Y.V1 | B.1.1.7   | 99.60      | 427.64 | 1.44     | 15.97      | 14.60    | 66             | yes      | 3           |
| HP04499 | 20I/501Y.V1 | B.1.1.7   | 99.60      | 415.81 | 4.63     | 23.18      | 23.00    | 84             | no       | negative    |
| HP04923 | 20G         | B.1.2     | 99.60      | 436.58 | Not done | Not done   | Not done | 47             | yes      | negative    |
| HP04930 | 20I/501Y.V1 | B.1.1.7   | 99.60      | 441.61 | Not done | Not done   | Not done | 7              | yes      | negative    |
| HP04931 | 20I/501Y.V1 | B.1.1.7   | 99.60      | 436.61 | Not done | Not done   | Not done | 3              | yes      | negative    |
| HP04957 | 20I/501Y.V1 | B.1.1.7   | 99.60      | 397.38 | 1.94     | 25.25      | 23.86    | 66             | yes      | negative    |
| HP05000 | 20C         | B.1.526   | 99.60      | 431.83 | 1.95     | 17.42      | 17.70    | 17             | yes      | 3           |
| HP05016 | 20I/501Y.V1 | B.1.1.7   | 99.60      | 366.65 | 1.28     | 27.58      | 25.56    | 71             | yes      | negative    |
| HP05024 | 20I/501Y.V1 | B.1.1.7   | 99.60      | 418.68 | 4.92     | 22.73      | 21.89    | 52             | yes      | negative    |
| HP05279 | 20I/501Y.V1 | B.1.1.7   | 99.60      | 433.09 | 2.82     | 18.42      | 17.34    | 11             | Yes      | negative    |
| HP05604 | 20C         | B.1.526   | 99.60      | 442.55 | 0.66     | 15.20      | 15.21    | 17             | Yes      | 4           |
| HP04481 | 20J/501Y.V3 | P.1       | 99.59      | 437.41 | 0.84     | 16.59      | 15.66    | 95             | yes      | 3           |
| HP05031 | 20I/501Y.V1 | B.1.1.7   | 99.59      | 437.20 | 4.81     | 22.41      | 21.98    | 85             | No       | negative    |
| HP03722 | 20C         | B.1.526   | 99.59      | 440.68 | 2.95     | 18.37      | 15.92    | 71             | yes      | 4           |
| HP04993 | 20A         | B.1.214.2 | 99.49      | 426.97 | 1.12     | 21.90      | 21.44    | 81             | yes      | negative    |
| HP05512 | 20I/501Y.V1 | B.1.1.7   | 98.70      | 265.03 | 0.76     | 21.79      | 21.60    | 6              | Yes      | negative    |
| HP05616 | 20I/501Y.V1 | B.1.1.7   | 98.70      | 405.92 | Not done | Not done   | Not done | 24             | No       | negative    |
| HP05025 | 20A         | B.1.620   | 98.68      | 429.94 | Not done | Not done   | Not done | 63             | yes      | negative    |
| HP03453 | 20I/501Y.V1 | B.1.1.7   | 98.60      | 419.70 | 4.20     | 18.21      | 16.32    | 56             | yes      | negative    |
| HP04204 | 20I/501Y.V1 | B.1.1.7   | 98.60      | 407.75 | 3.66     | 25.15      | 24.60    | 80             | yes      | negative    |
| HP04320 | 20I/501Y.V1 | B.1.1.7   | 98.60      | 392.79 | 1.74     | 16.80      | 16.81    | 63             | yes      | 5           |
| HP04461 | 20I/501Y.V1 | B.1.1.7   | 98.60      | 418.46 | 1.38     | 17.66      | 17.66    | 66             | no       | 5           |

|         |             |           |       |        |          |          |          |    |     |          |
|---------|-------------|-----------|-------|--------|----------|----------|----------|----|-----|----------|
| HP04464 | 20I/501Y.V1 | B.1.1.7   | 98.60 | 381.40 | 0.79     | 25.68    | 25.91    | 87 | no  | negative |
| HP05130 | 20I/501Y.V1 | B.1.1.7   | 98.60 | 420.76 | 1.94     | 17.99    | 17.22    | 59 | Yes | negative |
| HP05159 | 20I/501Y.V1 | B.1.1.7   | 98.60 | 411.48 | 0.80     | 16.17    | 15.61    | 39 | Yes | 5        |
| HP05181 | 20I/501Y.V1 | B.1.1.7   | 98.60 | 410.03 | 0.89     | 20.11    | 19.45    | 97 | Yes | 5        |
| HP05595 | 20I/501Y.V1 | B.1.1.7   | 98.60 | 288.57 | 2.39     | 18.12    | 17.68    | 75 | Yes | negative |
| HP05581 | 20C         | B.1.526   | 98.60 | 288.49 | 0.31     | 11.85    | 12.02    | 65 | Yes | 3        |
| HP04826 | 20I/501Y.V1 | B.1.1.7   | 98.60 | 405.38 | 2.32     | 22.03    | 22.00    | 71 | yes | negative |
| HP05129 | 20C         | B.1.526   | 98.60 | 404.86 | 2.13     | 14.86    | 14.04    | 53 | Yes | 3        |
| HP05253 | 20C         | B.1.575   | 98.05 | 338.42 | 0.43     | 27.08    | 28.25    | 75 | No  | negative |
| HP04656 | 20I/501Y.V1 | B.1.1.7   | 98.03 | 350.64 | 1.83     | 16.04    | 15.52    | 61 | no  | 3        |
| HP04632 | 20I/501Y.V1 | B.1.1.7   | 97.99 | 323.89 | 2.45     | 27.04    | 26.60    | 54 | no  | negative |
| HP05509 | 20H/501Y.V2 | B.1.351   | 97.97 | 287.24 | 0.34     | 24.75    | 26.09    | 28 | No  | negative |
| HP05160 | 20I/501Y.V1 | B.1.1.7   | 97.77 | 419.46 | 1.15     | 17.65    | 17.71    | 8  | No  | negative |
| HP05201 | 20I/501Y.V1 | B.1.1.7   | 97.75 | 379.48 | 0.74     | 21.75    | 20.73    | 84 | Yes | negative |
| HP04665 | 20C         | B.1.526.1 | 97.70 | 429.27 | 0.69     | 12.25    | 12.08    | 23 | yes | 3        |
| HP04198 | 20G         | B.1.596   | 97.65 | 397.35 | 2.76     | 23.15    | 21.90    | 17 | yes | 5        |
| HP04430 | 20I/501Y.V1 | B.1.1.7   | 96.78 | 368.56 | 3.96     | 20.93    | 20.61    | 71 | yes | negative |
| HP05168 | 20I/501Y.V1 | B.1.1.7   | 96.76 | 350.76 | 1.45     | 22.54    | 22.71    | 7  | Yes | negative |
| HP05171 | 20I/501Y.V1 | B.1.1.7   | 96.76 | 377.93 | 6.77     | 25.97    | 25.75    | 7  | Yes | negative |
| HP05145 | 20J/501Y.V3 | P.1       | 96.71 | 414.12 | 0.55     | 18.57    | 17.60    | 85 | Yes | 6        |
| HP03053 | 20I/501Y.V1 | B.1.1.7   | 96.62 | 273.11 | 3.93     | 22.45    | 22.32    | 21 | yes | negative |
| HP05105 | 20I/501Y.V1 | B.1.1.7   | 95.98 | 330.81 | 0.42     | 22.18    | 22.09    | 45 | No  | negative |
| HP05084 | 20C         | B.1.526.1 | 95.88 | 346.84 | 4.82     | 24.13    | 24.04    | 4  | Yes | negative |
| HP05277 | 20C         | B.1.526   | 95.49 | 179.36 | 5.75     | 18.11    | 18.40    | 61 | Yes | negative |
| HP04074 | 20I/501Y.V1 | B.1.1.7   | 94.98 | 218.59 | 2.34     | 30.85    | 31.08    | 46 | no  | negative |
| HP05805 | 20I/501Y.V1 | B.1.1.7   | 94.64 | 297.75 | 3.42     | 30.86    | 28.80    | 13 | yes | negative |
| HP05624 | 20C         | B.1.2     | 94.13 | 96.92  | 0.42     | 16.51    | 16.05    | 68 | Yes | negative |
| HP02169 | 20B         | B.1.1     | 93.61 | 154.00 | 1.45     | 31.21    | 32.00    | 8  | yes | negative |
| HP03374 | 20C         | B.1.526.1 | 92.62 | 229.55 | 2.07     | 32.21    | 33.51    | 43 | No  | negative |
| HP05596 | 20I/501Y.V1 | B.1.1.7   | 92.40 | 82.73  | 0.41     | 17.16    | 17.24    | 93 | Yes | negative |
| HP04615 | 20I/501Y.V1 | B.1.1.7   | 92.40 | 82.13  | 0.86     | 20.18    | 20.01    | 82 | yes | 3        |
| HP04999 | 20I/501Y.V1 | B.1.1.7   | 92.19 | 252.69 | not done | not done | not done | 27 | yes | negative |
| HP05494 | 20C         | B.1.526.3 | 91.62 | 198.59 | 3.81     | 26.81    | 26.93    | 68 | Yes | negative |
| HP05012 | 20I/501Y.V1 | B.1.1.7   | 90.58 | 212.49 | 3.59     | 37.32    | 38.07    | 71 | yes | negative |

|         |             |           |       |        |          |          |          |    |     |          |
|---------|-------------|-----------|-------|--------|----------|----------|----------|----|-----|----------|
| HP04298 | 20H/501Y.V2 | B.1.351   | 89.74 | 159.01 | not done | not done | not done | 85 | No  | negative |
| HP04949 | 20I/501Y.V1 | B.1.1.7   | 88.91 | 198.58 | 4.18     | 30.13    | 30.11    | 9  | yes | negative |
| HP04970 | 20C         | B.1.526.1 | 88.72 | 256.38 | 5.58     | 30.12    | 30.70    | 16 | yes | negative |
| HP04634 | 20I/501Y.V1 | B.1.1.7   | 88.65 | 73.38  | 1.00     | 22.37    | 22.67    | 75 | no  | negative |
| HP04423 | 20I/501Y.V1 | B.1.1.7   | 87.94 | 194.91 | 6.52     | 26.96    | 26.77    | 28 | no  | negative |
| HP02642 | 20B         | B.1.1.207 | 86.39 | 178.70 | not done | not done | not done | 12 | no  | negative |
| HP05620 | 20I/501Y.V1 | B.1.1.7   | 82.86 | 139.31 | not done | not done | not done | 31 | No  | negative |
| HP04646 | 20A         | B.1.153   | 80.62 | 52.47  | not done | not done | not done | 68 | yes | negative |
| HP05213 | 20I/501Y.V1 | B.1.1.7   | 79.58 | 152.19 | 1.19     | 31.91    | 31.93    | 49 | Yes | negative |
| HP04938 | 20I/501Y.V1 | B.1.1.7   | 77.30 | 146.08 | not done | not done | not done | 79 | no  | negative |
| HP05100 | 20I/501Y.V1 | B.1.1.7   | 76.81 | 180.71 | 0.32     | 29.66    | 26.96    | 83 | No  | negative |
| HP03628 | 20I/501Y.V1 | B.1.1.7   | 75.63 | 118.37 | 0.92     | 30.89    | 31.35    | 61 | yes | negative |
| HP05060 | 20J/501Y.V3 | B.1.566   | 75.58 | 151.32 | 0.50     | 29.04    | 28.58    | 3  | No  | negative |
| HP04192 | 20G         | B.1.2     | 70.05 | 90.64  | not done | not done | not done | 67 | No  | negative |
| HP05061 | 20J/501Y.V3 | B.1.566   | 68.34 | 99.77  | 0.76     | 30.65    | 31.41    | 38 | No  | negative |
| HP03047 | 20A         | B.1.243   | 68.20 | 82.34  | 1.45     | 30.71    | 32.04    | 19 | no  | negative |
| HP03839 | 20C         | B.1       | 67.63 | 91.57  | 0.65     | 36.99    | 37.69    | 33 | no  | negative |
| HP04636 | 20C         | B.1       | 59.60 | 52.07  | 0.91     | 30.22    | 29.33    | 4  | yes | negative |
| HP04984 | 20I/501Y.V1 | B.1.1.7   | 56.74 | 113.05 | 0.94     | 30.82    | 28.09    | 68 | yes | negative |
| HP03826 | 20C         | B.1       | 56.65 | 54.06  | 0.79     | 35.94    | ND       | 75 | no  | negative |
| HP04082 | 20A         | B.1.165   | 55.79 | 51.65  | 1.48     | 34.85    | 35.71    | 69 | no  | negative |
| HP04985 | 20I/501Y.V1 | B.1.1.7   | 51.33 | 62.29  | 2.49     | 32.46    | 31.88    | 66 | no  | negative |
| HP02196 | 20C         | None      | 44.19 | 29.00  | 2.49     | 33.03    | 33.55    | 4  | yes | negative |
| HP05821 | 20A         | None      | 43.97 | 25.63  | 0.72     | 34.18    | 31.63    | 70 | yes | negative |
| HP04824 | 20I/501Y.V1 | None      | 36.67 | 30.13  | 0.84     | 34.98    | 35.22    | 63 | no  | negative |
| HP03590 | 20A         | None      | 31.41 | 23.80  | 4.05     | 34.25    | 34.66    | 30 | yes | negative |
| HP04598 | 20H/501Y.V2 | None      | 26.20 | 13.67  | 2.51     | 27.31    | 27.55    | 49 | yes | negative |
| HP05059 | 20A         | None      | 25.99 | 18.95  | 4.79     | 35.98    | 34.63    | 2  | Yes | negative |
| HP05103 | 20A         | None      | 25.36 | 16.51  | 0.71     | 29.71    | 30.39    | 40 | No  | negative |
| HP03529 | 20I/501Y.V1 | None      | 23.64 | 16.11  | not done | not done | not done | 20 | no  | negative |
| HP05191 | 20I/501Y.V1 | None      | 22.33 | 20.69  | 1.17     | ND       | ND       | 56 | Yes | negative |
| HP03417 | 20C         | None      | 19.10 | 16.87  | 1.32     | 37.90    | 38.70    | 43 | yes | negative |
| HP05086 | 20I/501Y.V1 | None      | 18.99 | 15.06  | 5.67     | ND       | 37.29    | 21 | yes | negative |
| HP04629 | 20I/501Y.V1 | None      | 15.72 | 9.56   | 1.74     | 36.45    | 35.76    | 50 | no  | negative |

|         |             |      |       |       |          |          |          |    |     |          |
|---------|-------------|------|-------|-------|----------|----------|----------|----|-----|----------|
| HP05808 | 20G         | None | 15.60 | 9.99  | 6.32     | 31.44    | 30.51    | 33 | no  | negative |
| HP04619 | 20B         | None | 14.62 | 7.65  | 3.53     | 32.46    | 32.26    | 71 | no  | negative |
| HP04939 | 20I/501Y.V1 | None | 12.69 | 10.04 | not done | not done | not done | 63 | no  | negative |
| HP05010 | 20B         | None | 12.68 | 8.46  | 1.35     | 37.41    | ND       | 66 | no  | negative |
| HP04835 | 20A         | None | 9.16  | 11.43 | 5.06     | 37.59    | 36.32    | 9  | no  | negative |
| HP02131 | 20A         | None | 5.71  | 4.00  | not done | not done | not done | 14 | no  | negative |
| HP02344 | 19A         | None | 2.30  | 0.00  | not done | not done | not done | 31 | yes | negative |
| HP05613 | 20A         | None | 2.21  | 1.51  | not done | not done | not done | 16 | Yes | negative |
| HP03057 | 20A         | None | 1.11  | 1.65  | 5.41     | 32.72    | 32.14    | 20 | yes | negative |

Blue; potential false positives or very low viral loads

|         |   |      |      |      |          |          |          |     |     |          |
|---------|---|------|------|------|----------|----------|----------|-----|-----|----------|
| HP03657 | 0 | 0    | 0.00 | 0.00 | 4.46     | ND       | ND       | 18  | no  | negative |
| HP03664 | 0 | 0    | 0.00 | 0.00 | 4.59     | ND       | ND       | 30  | yes | negative |
| HP03671 | 0 | 0    | 0.00 | 0.00 | 1.02     | ND       | ND       | 54  | no  | negative |
| HP04832 | 0 | 0    | 0.00 | 0.00 | 0.68     | 37.92    | 38.30    | 100 | yes | negative |
| HP05813 | 0 | 0    | 0.00 | 0.00 | 2.51     | ND       | 38.32    | 37  | no  | negative |
| HP05819 | 0 | 0    | 0.00 | 0.00 | 0.51     | 38.35    | 36.72    | 14  | no  | negative |
| HP02185 | 0 | 0    | 0.00 | 0.00 | 5.23     | 36.22    | 38.01    | 5   | yes | negative |
| HP02170 | 0 | 0    | 0.00 | 0.00 | 5.50     | 38.06    | 36.32    | 14  | no  | negative |
| HP02164 | 0 | 0    | 0.00 | 0.00 | 6.05     | 40.17    | 37.14    | 11  | yes | negative |
| HP02755 | 0 | None | 0.00 | 1.08 | 4.33     | 36.26    | 36.50    | 6   | yes | negative |
| HP03610 | 0 | 0    | 0.00 | 0.00 | 3.61     | ND       | 38.55    | 9   | yes | negative |
| HP03831 | 0 | 0    | 0.00 | 0.00 | 3.21     | 34.43    | 34.91    | 41  | yes | negative |
| HP03849 | 0 | 0    | 0.00 | 0.00 | 1.08     | 36.90    | 37.70    | 66  | no  | negative |
| HP04040 | 0 | 0    | 0.00 | 0.00 | 1.05     | ND       | ND       | 21  | no  | negative |
| HP04235 | 0 | 0    | 0.00 | 0.00 | 4.52     | 38.14    | 38.83    | 75  | no  | negative |
| HP04446 | 0 | 0    | 0.00 | 0.00 | 0.99     | ND       | ND       | 64  | no  | negative |
| HP04451 | 0 | 0    | 0.00 | 0.00 | 1.23     | ND       | ND       | 37  | no  | negative |
| HP04455 | 0 | 0    | 0.00 | 0.00 | 3.36     | 35.00    | 34.55    | 3   | no  | negative |
| HP04614 | 0 | None | 0.00 | 0.14 | 3.04     | 35.46    | 34.32    | 6   | no  | negative |
| HP05249 | 0 | 0    | 0.00 | 0.00 | not done | not done | not done | 4   | No  | negative |
| HP05266 | 0 | None | 0.00 | 0.52 | 0.71     | 36.37    | 35.81    | 77  | No  | negative |
| HP05484 | 0 | 0    | 0.00 | 0.00 | 0.30     | 32.35    | 32.34    | 4   | Yes | negative |
| HP04564 | 0 | 0    | 0.00 | 0.00 | not done | not done | not done | 40  | No  | negative |
| HP02551 | 0 | 0    | 0.00 | 0.00 | 5.76     | ND       | ND       | 9   | no  | negative |

**not done; no left over samples were available for serology or PerkinElmers PCR runs  
ND; not detected**

Supplemental Table 2

| HPID    | Clade       | Pangolin_lineage_2_24 | %Coverage | Depth  | IgG (OD) | PE ORF1ab Ct | PE N Ct | Symptoms | Days to CPE |
|---------|-------------|-----------------------|-----------|--------|----------|--------------|---------|----------|-------------|
| HP02591 | 20G         | B.1                   | 98.60     | 350.17 | 0.78     | 16.66        | 16.70   | yes      | 2           |
| HP02411 | 20I/501Y.V1 | B.1.1.7               | 99.60     | 443.00 | 0.49     | 23.46        | 21.37   | yes      | 0           |
| HP02064 | 20I/501Y.V1 | B.1.1.7               | 99.60     | 389.00 | 3.77     | 24.79        | 23.98   | yes      | 0           |
| HP02221 | 20I/501Y.V1 | B.1.1.7               | 99.60     | 445.00 | 0.33     | 19.84        | 18.96   | yes      | 4           |
| HP02227 | 20I/501Y.V1 | B.1.1.7               | 99.60     | 437.00 | 0.32     | 21.12        | 20.35   | yes      | 4           |
| HP02269 | 20I/501Y.V1 | B.1.1.7               | 99.60     | 402.00 | 0.48     | 21.55        | 18.90   | yes      | 0           |
| HP02273 | 20I/501Y.V1 | B.1.1.7               | 99.60     | 314.00 | 0.41     | 22.01        | 21.01   | yes      | 0           |
| HP02360 | 20I/501Y.V1 | B.1.1.7               | 99.60     | 447.00 | 0.53     | 18.06        | 16.99   | yes      | 2           |
| HP02354 | 20I/501Y.V1 | B.1.1.7               | 99.60     | 447.00 | 0.40     | 19.65        | 18.00   | yes      | 0           |
| HP02486 | 20I/501Y.V1 | B.1.1.7               | 99.59     | 435.00 | 0.28     | 30.52        | 31.08   | no       | 0           |
| HP02492 | 20I/501Y.V1 | B.1.1.7               | 96.31     | 204.00 | 0.29     | 29.68        | 29.15   | yes      | 0           |
| HP02503 | 20I/501Y.V1 | B.1.1.7               | 97.31     | 420.00 | 0.58     | 26.91        | 25.85   | yes      | 0           |
| HP02500 | 20I/501Y.V1 | B.1.1.7               | 99.60     | 443.00 | 0.44     | 16.92        | 14.63   | yes      | 2           |
| HP02497 | 20I/501Y.V1 | B.1.1.7               | 99.60     | 435.00 | 0.39     | 16.51        | 15.46   | yes      | 3           |
| HP02528 | 20I/501Y.V1 | B.1.1.7               | 97.31     | 261.00 | 0.23     | 26.51        | 24.98   | yes      | 0           |
| HP02652 | 20I/501Y.V1 | B.1.1.7               | 99.60     | 442.44 | 0.38     | 23.26        | 22.70   | yes      | 2           |
| HP02664 | 20I/501Y.V1 | B.1.1.7               | 99.60     | 399.73 | 0.40     | 28.43        | 26.73   | yes      | 0           |
| HP02675 | 20I/501Y.V1 | B.1.1.7               | 92.55     | 236.07 | 0.40     | 31.50        | 31.13   | no       | 0           |
| HP02714 | 20I/501Y.V1 | B.1.1.7               | 99.60     | 421.23 | 0.29     | 26.43        | 24.88   | yes      | 0           |
| HP02639 | 20I/501Y.V1 | B.1.1.7               | 99.60     | 444.83 | 0.36     | 18.99        | 18.46   | yes      | 5           |
| HP02638 | 20I/501Y.V1 | B.1.1.7               | 99.60     | 443.07 | 0.29     | 17.71        | 16.88   | yes      | 3           |
| HP02792 | 20I/501Y.V1 | B.1.1.7               | 96.05     | 182.15 | 0.47     | 25.80        | 24.76   | yes      | 0           |
| HP02689 | 20I/501Y.V1 | B.1.1.7               | 99.60     | 422.63 | 0.42     | 26.54        | 25.83   | yes      | 0           |
| HP02724 | 20I/501Y.V1 | B.1.1.7               | 98.60     | 281.09 | 0.47     | 14.32        | 13.58   | yes      | 3           |
| HP02723 | 20I/501Y.V1 | B.1.1.7               | 96.91     | 120.33 | 0.36     | 17.05        | 16.33   | yes      | 2           |
| HP02727 | 20I/501Y.V1 | B.1.1.7               | 96.76     | 130.44 | 0.27     | 16.22        | 15.48   | yes      | 2           |
| HP02725 | 20I/501Y.V1 | B.1.1.7               | 97.04     | 180.66 | 0.36     | 21.01        | 20.60   | yes      | 4           |
| HP02767 | 20I/501Y.V1 | B.1.1.7               | 98.60     | 318.32 | 0.39     | 19.99        | 19.32   | yes      | 3           |
| HP03027 | 20I/501Y.V1 | B.1.1.7               | 97.15     | 381.50 | 0.31     | 23.44        | 22.47   | yes      | 3           |
| HP03075 | 20I/501Y.V1 | B.1.1.7               | 98.60     | 367.13 | 0.39     | 23.91        | 23.68   | yes      | 0           |
| HP03077 | 20I/501Y.V1 | B.1.1.7               | 98.61     | 367.82 | 0.80     | 22.83        | 21.93   | yes      | 0           |

|         |             |         |       |        |      |       |       |     |   |
|---------|-------------|---------|-------|--------|------|-------|-------|-----|---|
| HP03134 | 20I/501Y.V1 | B.1.1.7 | 99.60 | 446.53 | 0.43 | 14.24 | 12.47 | yes | 3 |
| HP03135 | 20I/501Y.V1 | B.1.1.7 | 99.60 | 444.21 | 0.34 | 20.92 | 20.24 | yes | 4 |
| HP03026 | 20I/501Y.V1 | B.1.1.7 | 93.40 | 333.15 | 0.38 | 25.40 | 24.38 | yes | 0 |
| HP03132 | 20I/501Y.V1 | B.1.1.7 | 99.60 | 446.02 | 0.31 | 21.92 | 21.51 | yes | 4 |
| HP03131 | 20I/501Y.V1 | B.1.1.7 | 99.60 | 444.78 | 0.38 | 22.78 | 21.85 | yes | 0 |
| HP03180 | 20I/501Y.V1 | B.1.1.7 | 99.60 | 448.44 | 0.42 | 15.20 | 13.33 | no  | 2 |
| HP03204 | 20I/501Y.V1 | B.1.1.7 | 99.60 | 440.39 | 0.36 | 24.53 | 24.09 | yes | 5 |
| HP03202 | 20I/501Y.V1 | B.1.1.7 | 99.60 | 440.13 | 0.41 | 24.51 | 22.85 | yes | 0 |
| HP03209 | 20I/501Y.V1 | B.1.1.7 | 99.60 | 447.93 | 0.44 | 19.00 | 18.15 | yes | 3 |
| HP03242 | 20I/501Y.V1 | B.1.1.7 | 99.59 | 445.94 | 0.37 | 15.19 | 14.14 | yes | 3 |
| HP03229 | 20I/501Y.V1 | B.1.1.7 | 99.60 | 438.28 | 0.31 | 24.34 | 23.27 | yes | 0 |
| HP03227 | 20I/501Y.V1 | B.1.1.7 | 98.71 | 414.71 | 0.33 | 29.20 | 27.65 | yes | 0 |
| HP03186 | 20I/501Y.V1 | B.1.1.7 | 99.59 | 449.38 | 0.47 | 16.48 | 15.46 | yes | 2 |
| HP03200 | 20I/501Y.V1 | B.1.1.7 | 99.60 | 446.60 | 0.30 | 21.79 | 20.50 | yes | 4 |
| HP03250 | 20I/501Y.V1 | B.1.1.7 | 99.60 | 447.18 | 0.36 | 18.67 | 17.72 | yes | 3 |
| HP02338 | 20G         | B.1.2   | 99.60 | 428.00 | 0.35 | 16.86 | 16.37 | yes | 2 |
| HP02336 | 20G         | B.1.2   | 99.60 | 410.00 | 0.25 | 15.94 | 15.91 | yes | 2 |
| HP02374 | 20G         | B.1.2   | 99.60 | 449.00 | 0.36 | 16.93 | 16.49 | yes | 2 |
| HP02369 | 20G         | B.1.2   | 99.60 | 446.00 | 0.26 | 21.20 | 18.80 | yes | 2 |
| HP02391 | 20G         | B.1.2   | 99.60 | 449.00 | 0.27 | 12.79 | 12.61 | yes | 2 |
| HP02372 | 20G         | B.1.2   | 98.87 | 444.00 | 0.21 | 17.24 | 16.14 | yes | 2 |
| HP02367 | 20G         | B.1.2   | 99.02 | 397.00 | 0.31 | 26.09 | 25.73 | yes | 0 |
| HP02388 | 20G         | B.1.2   | 99.60 | 448.00 | 0.34 | 17.55 | 15.75 | yes | 2 |
| HP02390 | 20G         | B.1.2   | 99.60 | 440.00 | 0.31 | 23.96 | 23.53 | yes | 2 |
| HP02386 | 20G         | B.1.2   | 99.60 | 449.00 | 0.28 | 15.41 | 15.11 | no  | 2 |
| HP02407 | 20G         | B.1.2   | 99.59 | 447.00 | 0.37 | 17.65 | 17.01 | yes | 2 |
| HP02412 | 20G         | B.1.2   | 99.60 | 439.00 | 0.22 | 24.66 | 24.19 | no  | 3 |
| HP02404 | 20G         | B.1.2   | 99.60 | 446.00 | 1.16 | 13.79 | 13.05 | yes | 2 |
| HP02469 | 20G         | B.1.2   | 99.60 | 443.00 | 0.31 | 19.68 | 19.46 | yes | 2 |
| HP02397 | 20G         | B.1.2   | 99.60 | 444.00 | 0.35 | 23.28 | 23.17 | no  | 3 |
| HP02389 | 20G         | B.1.2   | 97.87 | 324.00 | 0.35 | 28.15 | 27.32 | yes | 0 |
| HP02525 | 20G         | B.1.2   | 91.74 | 141.00 | 1.89 | 30.59 | 30.03 | no  | 0 |
| HP02459 | 20G         | B.1.2   | 99.60 | 420.00 | 0.34 | 21.81 | 22.00 | yes | 3 |
| HP02517 | 20G         | B.1.2   | 99.59 | 352.00 | 0.31 | 20.70 | 20.43 | yes | 2 |

|         |     |       |       |        |      |       |       |     |   |
|---------|-----|-------|-------|--------|------|-------|-------|-----|---|
| HP02443 | 20G | B.1.2 | 94.36 | 228.00 | 0.26 | 31.21 | 31.02 | yes | 0 |
| HP02477 | 20G | B.1.2 | 98.60 | 308.00 | 0.35 | 26.76 | 26.75 | yes | 0 |
| HP02347 | 20G | B.1.2 | 99.60 | 445.00 | 0.36 | 20.05 | 19.57 | yes | 2 |
| HP02355 | 20G | B.1.2 | 99.60 | 445.00 | 0.27 | 17.03 | 16.33 | yes | 2 |
| HP02489 | 20G | B.1.2 | 95.91 | 225.00 | 1.79 | 29.29 | 29.33 | no  | 0 |
| HP02356 | 20G | B.1.2 | 99.60 | 446.00 | 0.34 | 15.97 | 15.99 | no  | 2 |
| HP02555 | 20G | B.1.2 | 95.98 | 236.24 | 0.20 | 21.18 | 19.70 | yes | 2 |
| HP02501 | 20G | B.1.2 | 97.31 | 394.00 | 0.27 | 24.95 | 24.75 | yes | 2 |
| HP02544 | 20G | B.1.2 | 91.62 | 208.79 | 0.57 | 28.46 | 28.76 | no  | 0 |
| HP02363 | 20G | B.1.2 | 99.60 | 448.00 | 0.73 | 16.94 | 16.01 | yes | 4 |
| HP02364 | 20G | B.1.2 | 99.60 | 445.00 | 0.29 | 20.85 | 20.68 | yes | 2 |
| HP02506 | 20G | B.1.2 | 94.57 | 246.00 | 0.20 | 31.73 | 31.34 | yes | 0 |
| HP02548 | 20G | B.1.2 | 97.61 | 301.74 | 0.53 | 23.47 | 22.82 | yes | 0 |
| HP02509 | 20G | B.1.2 | 98.68 | 425.00 | 0.39 | 20.24 | 19.97 | yes | 3 |
| HP02570 | 20G | B.1.2 | 97.61 | 278.82 | 0.81 | 29.71 | 29.30 | yes | 0 |
| HP02571 | 20G | B.1.2 | 97.61 | 315.33 | 0.21 | 24.70 | 23.95 | no  | 0 |
| HP02533 | 20G | B.1.2 | 97.61 | 270.55 | 0.22 | 16.12 | 16.15 | yes | 2 |
| HP02536 | 20G | B.1.2 | 98.60 | 312.55 | 0.27 | 18.25 | 18.17 | yes | 2 |
| HP02535 | 20G | B.1.2 | 99.60 | 350.42 | 0.43 | 15.55 | 14.86 | no  | 2 |
| HP02585 | 20G | B.1.2 | 94.54 | 178.95 | 0.22 | 29.58 | 27.15 | yes | 0 |
| HP02577 | 20G | B.1.2 | 97.61 | 307.10 | 0.25 | 25.41 | 25.04 | no  | 3 |
| HP02607 | 20G | B.1.2 | 96.82 | 297.60 | 0.67 | 22.29 | 21.76 | yes | 0 |
| HP02589 | 20G | B.1.2 | 99.60 | 387.50 | 0.62 | 20.16 | 19.76 | yes | 2 |
| HP02653 | 20G | B.1.2 | 99.60 | 416.37 | 0.41 | 26.80 | 26.77 | yes | 0 |
| HP02657 | 20G | B.1.2 | 94.03 | 262.27 | 5.11 | 32.38 | 29.07 | yes | 0 |
| HP02710 | 20G | B.1.2 | 99.60 | 426.28 | 0.27 | 19.87 | 19.05 | yes | 3 |
| HP02651 | 20G | B.1.2 | 99.60 | 424.19 | 0.37 | 24.43 | 24.25 | yes | 3 |
| HP02628 | 20G | B.1.2 | 98.61 | 439.84 | 0.26 | 15.53 | 15.23 | yes | 2 |
| HP02682 | 20G | B.1.2 | 99.60 | 432.70 | 1.06 | 24.52 | 24.71 | yes | 0 |
| HP02698 | 20G | B.1.2 | 96.99 | 261.86 | 0.50 | 26.26 | 26.22 | yes | 0 |
| HP02685 | 20G | B.1.2 | 99.60 | 409.73 | 0.35 | 23.71 | 23.88 | yes | 0 |
| HP02683 | 20G | B.1.2 | 99.60 | 436.39 | 3.32 | 22.67 | 22.86 | yes | 5 |
| HP02604 | 20G | B.1.2 | 97.61 | 321.34 | 0.29 | 20.14 | 20.03 | yes | 2 |
| HP02713 | 20G | B.1.2 | 99.60 | 447.87 | 0.35 | 15.86 | 15.49 | yes | 2 |



|         |             |         |       |        |      |       |       |     |   |
|---------|-------------|---------|-------|--------|------|-------|-------|-----|---|
| HP02635 | 20G         | B.1.2   | 99.60 | 443.34 | 0.58 | 16.69 | 16.29 | yes | 3 |
| HP02735 | 20G         | B.1.2   | 97.99 | 228.56 | 0.50 | 17.00 | 16.27 | yes | 2 |
| HP02765 | 20G         | B.1.2   | 98.66 | 370.15 | 0.30 | 21.49 | 21.52 | yes | 4 |
| HP02762 | 20G         | B.1.2   | 98.03 | 336.60 | 0.29 | 23.20 | 23.98 | yes | 3 |
| HP02751 | 20G         | B.1.2   | 97.68 | 345.15 | 0.51 | 28.07 | 29.02 | yes | 4 |
| HP02721 | 20G         | B.1.2   | 99.60 | 397.69 | 0.58 | 15.85 | 15.80 | yes | 2 |
| HP02775 | 20G         | B.1.2   | 97.85 | 186.10 | 0.30 | 25.92 | 25.69 | yes | 0 |
| HP02772 | 20G         | B.1.2   | 99.59 | 413.38 | 0.49 | 18.71 | 18.37 | yes | 2 |
| HP02776 | 20G         | B.1.2   | 98.60 | 295.23 | 0.35 | 20.71 | 20.29 | yes | 2 |
| HP03031 | 20G         | B.1.2   | 93.45 | 365.22 | 0.36 | 23.63 | 23.87 | yes | 2 |
| HP03067 | 20G         | B.1.2   | 98.41 | 374.71 | 0.24 | 25.35 | 25.35 | yes | 3 |
| HP03060 | 20G         | B.1.2   | 96.62 | 222.17 | 0.35 | 21.70 | 21.24 | yes | 3 |
| HP03036 | 20G         | B.1.2   | 99.60 | 422.96 | 0.44 | 16.42 | 16.62 | no  | 2 |
| HP03103 | 20G         | B.1.2   | 99.60 | 442.02 | 0.41 | 16.94 | 16.73 | yes | 2 |
| HP03113 | 20G         | B.1.2   | 98.60 | 344.66 | 0.49 | 28.00 | 28.74 | yes | 0 |
| HP03109 | 20G         | B.1.2   | 99.60 | 445.28 | 0.92 | 27.83 | 27.90 | yes | 0 |
| HP03107 | 20G         | B.1.2   | 99.60 | 444.55 | 0.42 | 14.85 | 14.83 | yes | 2 |
| HP03148 | 20G         | B.1.2   | 99.02 | 374.78 | 0.35 | 24.61 | 25.44 | yes | 3 |
| HP03122 | 20G         | B.1.2   | 99.60 | 443.96 | 0.27 | 20.39 | 20.96 | yes | 3 |
| HP03130 | 20G         | B.1.2   | 98.09 | 335.66 | 0.87 | 28.89 | 27.98 | yes | 0 |
| HP03212 | 20G         | B.1.2   | 99.60 | 444.50 | 1.40 | 19.87 | 20.03 | No  | 2 |
| HP03215 | 20G         | B.1.2   | 99.44 | 441.19 | 0.89 | 18.46 | 18.44 | yes | 2 |
| HP03086 | 20H/501Y.V2 | B.1.351 | 95.89 | 191.56 | 0.38 | 23.89 | 24.17 | yes | 4 |
| HP03124 | 20H/501Y.V2 | B.1.351 | 98.87 | 388.28 | 0.37 | 27.27 | 27.23 | yes | 0 |
| HP03201 | 20H/501Y.V2 | B.1.351 | 98.87 | 442.12 | 0.36 | 23.73 | 24.44 | yes | 3 |

Supplemental Table 3

| HPID                    | EPI_ISL    | Lineage   | Substitutions                          | AA deletions                                                               |
|-------------------------|------------|-----------|----------------------------------------|----------------------------------------------------------------------------|
| <b>Fully Vaccinated</b> |            |           |                                        |                                                                            |
| HP05084                 | EPI_ISL_19 | B.1.526.1 | N:M1X,N:T                              | ORF1a:S3675-,ORF1a:G3676-,ORF1a:F3677-                                     |
| HP05581                 | EPI_ISL_21 | B.1.526   | N:M1X,N:P                              | ORF1a:S3675-,ORF1a:G3676-,ORF1a:F3677-                                     |
| HP05624                 |            | B.1.2     | N:M1X,N:P                              | ORF1a:S3675-,ORF1a:G3676-,ORF1a:F3677-                                     |
| HP04923                 | EPI_ISL_18 | B.1.2     | N:P67S,N:P199L,N:D377Y,                | ORF1a:T265I,ORF1a:T1246I,ORF1a:M2606I,ORF1a:L3352F,ORF1b:P314L,ORF1b:T116I |
| HP04957                 |            | B.1.1.7   | N:M1X,N:D                              | ORF1a:S3675-,ORF1a:G3676-,ORF1a:F3677-,S:H69-,S:V70-,S:Y144-               |
| HP04198                 | EPI_ISL_16 | B.1.596   | E:L21V,N:P67S,N:P199L,N:T271I,N:E378Q, | ORF1a:T265I,ORF1a:E974G,ORF1a:T2280I,ORF1a:L3352F,ORF1b:P314L              |
| HP05012                 | EPI_ISL_19 | B.1.1.7   | N:M1X,N:D                              | ORF1a:S3675-,ORF1a:G3676-,ORF1a:F3677-,S:H69-,S:V70-,S:Y144-               |
| HP05105                 | EPI_ISL_19 | B.1.1.7   | N:M1X,N:D                              | ORF1a:S3675-,ORF1a:G3676-,ORF1a:F3677-,S:H69-,S:V70-,S:Y144-               |
| HP05805                 |            | B.1.1.7   | N:M1X,N:D                              | ORF1a:S3675-,ORF1a:G3676-,ORF1a:F3677-,S:H69-,S:V70-,S:Y144-               |
| HP04818                 | EPI_ISL_18 | B.1.1.7   | N:M1X,N:D                              | ORF1a:S3675-,ORF1a:G3676-,ORF1a:F3677-,S:H69-,S:V70-,S:Y144-               |
| HP05815                 | EPI_ISL_22 | B.1.1.7   | N:M1X,N:D                              | ORF1a:S3675-,ORF1a:G3676-,ORF1a:F3677-,S:H69-,S:V70-,S:Y144-               |
| HP05816                 | EPI_ISL_22 | B.1.526   | N:M1X,N:P                              | ORF1a:S3675-,ORF1a:G3676-,ORF1a:F3677-                                     |
| HP03729                 | EPI_ISL_14 | B.1.1.7   | N:M1X,N:D                              | ORF1a:S3675-,ORF1a:G3676-,ORF1a:F3677-,S:H69-,S:V70-,S:Y144-               |
| HP03775                 | EPI_ISL_14 | B.1.1.7   | N:M1X,N:D                              | ORF1a:S3675-,ORF1a:G3676-,ORF1a:F3677-,S:H69-,S:V70-,S:Y144-               |
| HP03786                 | EPI_ISL_14 | B.1.1.7   | N:M1X,N:D                              | ORF1a:S3675-,ORF1a:G3676-,ORF1a:F3677-,S:H69-,S:V70-,S:Y144-               |
| HP04129                 | EPI_ISL_15 | B.1.1.7   | N:M1X,N:D                              | ORF1a:S3675-,ORF1a:G3676-,ORF1a:F3677-,S:H69-,S:V70-,S:Y144-               |
| HP04153                 | EPI_ISL_19 | B.1.1.7   | M:G89S,N:                              | ORF1a:S3675-,ORF1a:G3676-,ORF1a:F3677-,S:H69-,S:V70-,S:Y144-               |
| HP04182                 | EPI_ISL_19 | B.1.1.7   | N:M1X,N:D                              | ORF1a:S3675-,ORF1a:G3676-,ORF1a:F3677-,S:H69-,S:V70-,S:Y144-               |
| HP04113                 | EPI_ISL_15 | B.1.526   | N:M1X,N:P                              | ORF1a:S3675-,ORF1a:G3676-,ORF1a:F3677-                                     |
| HP04414                 | EPI_ISL_16 | B.1.1.7   | N:M1X,N:D                              | ORF1a:S3675-,ORF1a:G3676-,ORF1a:F3677-,S:H69-,S:V70-,S:Y144-               |
| HP04499                 | EPI_ISL_16 | B.1.1.7   | N:M1X,N:D                              | ORF1a:S3675-,ORF1a:G3676-,ORF1a:F3677-,S:H69-,S:V70-,S:Y144-               |
| HP04930                 | EPI_ISL_18 | B.1.1.7   | N:M1X,N:D                              | ORF1a:S3675-,ORF1a:G3676-,ORF1a:F3677-,S:H69-,S:V70-,S:Y144-               |
| HP04931                 | EPI_ISL_18 | B.1.1.7   | N:M1X,N:D                              | ORF1a:S3675-,ORF1a:G3676-,ORF1a:F3677-,S:H69-,S:V70-,S:Y144-               |
| HP05000                 | EPI_ISL_19 | B.1.526   | N:M1X,N:P                              | ORF1a:S3675-,ORF1a:G3676-,ORF1a:F3677-                                     |
| HP05016                 |            | B.1.1.7   | N:M1X,N:D                              | ORF1a:S3675-,ORF1a:G3676-,ORF1a:F3677-,S:H69-,S:V70-,S:Y144-               |
| HP05024                 | EPI_ISL_19 | B.1.1.7   | N:M1X,N:D                              | ORF1a:S3675-,ORF1a:G3676-,ORF1a:F3677-,S:H69-,S:V70-,S:Y144-               |
| HP04481                 | EPI_ISL_16 | P.1       | N:P80R,N:F                             | ORF1a:S3675-,ORF1a:G3676-,ORF1a:F3677-                                     |
| HP05031                 | EPI_ISL_19 | B.1.1.7   | N:M1X,N:D                              | ORF1a:S3675-,ORF1a:G3676-,ORF1a:F3677-,S:H69-,S:V70-,S:Y144-               |
| HP03722                 | EPI_ISL_19 | B.1.526   | N:M1X,N:P                              | ORF1a:S3675-,ORF1a:G3676-,ORF1a:F3677-                                     |
| HP04993                 | EPI_ISL_21 | B.1.214.2 | N:M1X,N:D                              | ORF1a:S3675-,ORF1a:G3676-,ORF1a:F3677-                                     |
| HP05512                 | EPI_ISL_21 | B.1.1.7   | N:M1X,N:D                              | ORF1a:S3675-,ORF1a:G3676-,ORF1a:F3677-,S:H69-,S:V70-,S:Y144-               |

HP05025 EPI\_ISL\_19 B.1.620 N:A220V,O ORF1a:S3675-,ORF1a:G3676-,ORF1a:F3677-,ORF7b:L14-,S:H69-,S:V70-,S:Y144-,S:L242-,S:A243-  
 HP03453 EPI\_ISL\_14 B.1.1.7 N:M1X,N:D ORF1a:S3675-,ORF1a:G3676-,ORF1a:F3677-,S:H69-,S:V70-,S:Y144-  
 HP04204 EPI\_ISL\_16 B.1.1.7 N:M1X,N:D ORF1a:S3675-,ORF1a:G3676-,ORF1a:F3677-,S:H69-,S:V70-,S:Y144-  
 HP04320 EPI\_ISL\_16 B.1.1.7 N:M1X,N:D ORF1a:S3675-,ORF1a:G3676-,ORF1a:F3677-,S:H69-,S:V70-,S:Y144-  
 HP04461 EPI\_ISL\_16 B.1.1.7 N:M1X,N:D ORF1a:S3675-,ORF1a:G3676-,ORF1a:F3677-,S:H69-,S:V70-,S:Y144-  
 HP04464 B.1.1.7 N:M1X,N:D ORF1a:S3675-,ORF1a:G3676-,ORF1a:F3677-,S:H69-,S:V70-,S:Y144-  
 HP05130 EPI\_ISL\_19 B.1.1.7 N:M1X,N:D ORF1a:S3675-,ORF1a:G3676-,ORF1a:F3677-,S:H69-,S:V70-,S:Y144-  
 HP05159 EPI\_ISL\_19 B.1.1.7 N:M1X,N:D ORF1a:S3675-,ORF1a:G3676-,ORF1a:F3677-,S:H69-,S:V70-,S:Y144-  
 HP05181 EPI\_ISL\_19 B.1.1.7 N:M1X,N:D ORF1a:S3675-,ORF1a:G3676-,ORF1a:F3677-,S:H69-,S:V70-,S:Y144-  
 HP05595 EPI\_ISL\_21 B.1.1.7 N:M1X,N:D ORF1a:S3675-,ORF1a:G3676-,ORF1a:F3677-,S:H69-,S:V70-,S:Y144-  
 HP04826 EPI\_ISL\_18 B.1.1.7 N:M1X,N:D ORF1a:S3675-,ORF1a:G3676-,ORF1a:F3677-,S:H69-,S:V70-,S:Y144-  
 HP05129 EPI\_ISL\_19 B.1.526 N:M1X,N:P ORF1a:S3675-,ORF1a:G3676-,ORF1a:F3677-  
 HP04656 EPI\_ISL\_23 B.1.1.7 N:M1X,N:D ORF1a:S3675-,ORF1a:G3676-,ORF1a:F3677-,S:H69-,S:V70-,S:Y144-  
 HP04632 EPI\_ISL\_23 B.1.1.7 N:M1X,N:D ORF1a:S3675-,ORF1a:G3676-,ORF1a:F3677-,S:H69-,S:V70-,S:Y144-  
 HP05509 EPI\_ISL\_21 B.1.351 E:P71L,N:P ORF1a:S3675-,ORF1a:G3676-,ORF1a:F3677-,S:A243-,S:L244-,S:H245-  
 HP05160 EPI\_ISL\_19 B.1.1.7 N:M1X,N:D ORF1a:S3675-,ORF1a:G3676-,ORF1a:F3677-,S:H69-,S:V70-,S:Y144-  
 HP05201 EPI\_ISL\_19 B.1.1.7 N:M1X,N:D ORF1a:S3675-,ORF1a:G3676-,ORF1a:F3677-,ORF7a:T120-,ORF7a:E121-,ORF7a:\*122-,ORF7b:M1-,OR  
 HP04665 EPI\_ISL\_16 B.1.526.1 N:M1X,N:T ORF1a:S3675-,ORF1a:G3676-,ORF1a:F3677-  
 HP04430 EPI\_ISL\_19 B.1.1.7 N:M1X,N:D ORF1a:S3675-,ORF1a:G3676-,ORF1a:F3677-,ORF7a:S60-,ORF7a:T61-,ORF7a:Q62-,ORF7a:F63-,ORF7a:  
 HP05168 EPI\_ISL\_19 B.1.1.7 N:M1X,N:D ORF1a:S3675-,ORF1a:G3676-,ORF1a:F3677-,S:H69-,S:V70-,S:Y144-  
 HP05171 EPI\_ISL\_19 B.1.1.7 N:M1X,N:D ORF1a:S3675-,ORF1a:G3676-,ORF1a:F3677-,S:H69-,S:V70-,S:Y144-  
 HP05145 EPI\_ISL\_19 P.1 N:P80R,N:F ORF1a:S3675-,ORF1a:G3676-,ORF1a:F3677-  
 HP03053 EPI\_ISL\_12 B.1.1.7 N:M1X,N:D ORF1a:S3675-,ORF1a:G3676-,ORF1a:F3677-,S:H69-,S:V70-,S:Y144-  
 HP05277 EPI\_ISL\_21 B.1.526 N:M1X,N:P ORF1a:S3675-,ORF1a:G3676-,ORF1a:F3677-  
 HP04074 EPI\_ISL\_15 B.1.1.7 N:M1X,N:D ORF1a:S3675-,ORF1a:G3676-,ORF1a:F3677-,S:H69-,S:V70-,S:Y144-  
 HP02169 EPI\_ISL\_14 B.1.1 N:R203K,N ORF3a:V256-  
 HP03374 EPI\_ISL\_13 B.1.526.1 N:M1X,N:P199L,N:M234I,ORF1a:T265I,ORF1a:L3201P,ORF1b:P314L,ORF3a:P42L,ORF3a:Q57H,ORF8:T11I,S:L5F,  
 HP05596 B.1.1.7 N:M1X,N:D ORF1a:S3675-,ORF1a:G3676-,ORF1a:F3677-,S:H69-,S:V70-,S:Y144-  
 HP04615 B.1.1.7 N:M1X,N:D ORF1a:S3675-,ORF1a:G3676-,ORF1a:F3677-,S:H69-,S:V70-,S:Y144-  
 HP04999 EPI\_ISL\_19 B.1.1.7 N:M1X,N:D ORF1a:S3675-,ORF1a:G3676-,ORF1a:F3677-,S:H69-,S:V70-,S:Y144-  
 HP05494 EPI\_ISL\_21 B.1.526.3 N:M1X,N:P ORF1a:S3675-,ORF1a:G3676-,ORF1a:F3677-  
 HP04298 B.1.351 E:P71L,N:T ORF1a:S3675-,ORF1a:G3676-,ORF1a:F3677-,S:A243-,S:L244-,S:H245-  
 HP05604 EPI\_ISL\_22 B.1.526 N:M1X,N:P ORF1a:S3675-,ORF1a:G3676-,ORF1a:F3677-  
 HP05616 EPI\_ISL\_22 B.1.1.7 N:M1X,N:D ORF1a:S3675-,ORF1a:G3676-,ORF1a:F3677-,S:H69-,S:V70-,S:Y144-

HP05279 EPI\_ISL\_22 B.1.1.7 N:M1X,N:D ORF1a:S3675-,ORF1a:G3676-,ORF1a:F3677-,S:H69-,S:V70-,S:Y144-  
 HP05253 EPI\_ISL\_22 B.1.575 M:I82T,N:M1X,ORF1a:T265I,ORF1a:K367R,ORF1a:A687D,ORF1a:V2061I,ORF1a:K2395R,ORF1a:T3255I,ORF1a:T3  
 Control Group  
 HP03082 EPI\_ISL\_12 B.1.1.7 N:M1X,N:D ORF1a:S3675-,ORF1a:G3676-,ORF1a:F3677-,S:H69-,S:V70-,S:Y144-  
 HP03086 EPI\_ISL\_12 B.1.351 E:P71L,N:T ORF1a:S3675-,ORF1a:G3676-,ORF1a:F3677-,S:A243-,S:L244-,S:H245-  
 HP03247 EPI\_ISL\_12 B.1.429 N:T205I,N:M234I,ORF1a:H110Y,ORF1a:T265I,ORF1a:I4205V,ORF1b:P314L,ORF1b:D1183Y,ORF3a:Q57H,ORF8:S6  
 HP03405 EPI\_ISL\_13 B.1.2 N:P67S,N:P199L,ORF1a:T265I,ORF1a:L2295F,ORF1a:M2606I,ORF1a:E2918G,ORF1a:L3352F,ORF1a:M3752I,ORF:  
 HP03406 EPI\_ISL\_13 B.1.1.486 N:R203K,N:G204R,N:M234I,ORF1a:S2822F,ORF1b:P314L,ORF3a:S58N,ORF3a:H78Y,ORF3a:P104L,ORF6:I14T,S:T:  
 HP03407 EPI\_ISL\_13 B.1.311 N:Q9H,N:T135I,N:P207L,N:T391I,ORF1a:F143L,ORF1a:T265I,ORF1a:Q1582H,ORF1a:T2978I,ORF1a:T4087I,ORF1a:  
 HP03409 EPI\_ISL\_13 B.1.2 N:P67S,N:P199L,N:P383L,ORF1a:T265I,ORF1a:L3352F,ORF1a:D3526G,ORF1b:P314L,ORF1b:N1653D,ORF1b:R21:  
 HP03436 EPI\_ISL\_13 B.1.526.1 N:M1X,N:T ORF1a:S3675-,ORF1a:G3676-,ORF1a:F3677-,S:Y144-  
 HP03438 EPI\_ISL\_13 B.1.1.7 N:M1X,N:D ORF1a:S3675-,ORF1a:G3676-,ORF1a:F3677-,S:H69-,S:V70-,S:Y144-  
 HP03439 EPI\_ISL\_13 B.1.1.7 N:M1X,N:D ORF1a:S3675-,ORF1a:G3676-,ORF1a:F3677-,S:H69-,S:V70-,S:Y144-  
 HP03449 EPI\_ISL\_14 B.1.1.7 N:M1X,N:D ORF1a:S3675-,ORF1a:G3676-,ORF1a:F3677-,S:H69-,S:V70-,S:Y144-  
 HP03450 EPI\_ISL\_14 B.1.243 N:S194L,ORF1a:V438A,ORF1a:G2118D,ORF1a:N2523T,ORF1b:P314L,ORF1b:A576V,ORF3a:T151I,ORF6:K42N,S:L  
 HP03530 EPI\_ISL\_14 B.1.351 E:P71L,N:T ORF1a:S3675-,ORF1a:G3676-,ORF1a:F3677-,S:A243-,S:L244-,S:H245-  
 HP03840 EPI\_ISL\_19 B.1.526.1 N:M1X,N:P ORF1a:S3675-,ORF1a:G3676-,ORF1a:F3677-  
 HP03862 EPI\_ISL\_14 B.1.1.7 N:M1X,N:D ORF1a:S3675-,ORF1a:G3676-,ORF1a:F3677-,S:H69-,S:V70-,S:Y144-  
 HP03875 EPI\_ISL\_14 B.1.526.1 N:M1X,N:T ORF1a:S3675-,ORF1a:G3676-,ORF1a:F3677-  
 HP03877 EPI\_ISL\_14 B.1.526.1 N:M1X,N:T ORF1a:S3675-,ORF1a:G3676-,ORF1a:F3677-  
 HP03879 EPI\_ISL\_14 B.1.526.1 N:M1X,N:T ORF1a:S3675-,ORF1a:G3676-,ORF1a:F3677-  
 HP04004 EPI\_ISL\_15 B.1.1.7 N:M1X,N:D ORF1a:S3675-,ORF1a:G3676-,ORF1a:F3677-,S:H69-,S:V70-,S:Y144-  
 HP04005 EPI\_ISL\_15 B.1.1.7 N:M1X,N:D ORF1a:S3675-,ORF1a:G3676-,ORF1a:F3677-,S:H69-,S:V70-,S:Y144-  
 HP04051 EPI\_ISL\_15 B.1.1.7 N:M1X,N:D ORF1a:S3675-,ORF1a:G3676-,ORF1a:F3677-,S:H69-,S:V70-,S:Y144-  
 HP04053 EPI\_ISL\_15 B.1.526.1 N:M1X,N:T ORF1a:S3675-,ORF1a:G3676-,ORF1a:F3677-  
 HP04054 EPI\_ISL\_15 B.1.1.7 N:M1X,N:D ORF1a:S3675-,ORF1a:G3676-,ORF1a:F3677-,S:H69-,S:V70-,S:Y144-  
 HP04056 EPI\_ISL\_15 B.1.1.7 N:M1X,N:D ORF1a:S3675-,ORF1a:G3676-,ORF1a:F3677-,S:H69-,S:V70-,S:Y144-  
 HP04057 EPI\_ISL\_15 B.1.1.7 N:M1X,N:D ORF1a:S3675-,ORF1a:G3676-,ORF1a:F3677-,S:H69-,S:V70-,S:Y144-  
 HP04062 EPI\_ISL\_15 B.1.526.1 N:M1X,N:P ORF1a:S3675-,ORF1a:G3676-,ORF1a:F3677-  
 HP04063 EPI\_ISL\_15 B.1.1.7 N:M1X,N:D ORF1a:S3675-,ORF1a:G3676-,ORF1a:F3677-,S:H69-,S:V70-,S:Y144-  
 HP04064 EPI\_ISL\_15 B.1.1.7 N:M1X,N:D ORF1a:S3675-,ORF1a:G3676-,ORF1a:F3677-,S:H69-,S:V70-,S:Y144-  
 HP04068 EPI\_ISL\_19 B.1.1.7 N:M1X,N:D ORF1a:S3675-,ORF1a:G3676-,ORF1a:F3677-,ORF7a:S60-,ORF7a:T61-,ORF7a:Q62-,ORF7a:F63-,ORF7a:  
 HP04071 EPI\_ISL\_15 B.1.526.1 N:M1X,N:T ORF1a:S3675-,ORF1a:G3676-,ORF1a:F3677-  
 HP04072 EPI\_ISL\_15 B.1.526.1 N:M1X,N:T ORF1a:S3675-,ORF1a:G3676-,ORF1a:F3677-

HP04075 EPI\_ISL\_15 B.1.243 N:S194L,N:I337V,ORF1a:V438A,ORF1a:G2118D,ORF1a:N2523T,ORF1b:P314L,ORF1b:A576V,ORF3a:T151I,ORF7a  
 HP04076 EPI\_ISL\_15 B.1.1.7 N:M1X,N:D ORF1a:S3675-,ORF1a:G3676-,ORF1a:F3677-,S:H69-,S:V70-,S:Y144-  
 HP04077 EPI\_ISL\_15 B.1.1.7 N:M1X,N:D ORF1a:S3675-,ORF1a:G3676-,ORF1a:F3677-,S:H69-,S:V70-,S:Y144-  
 HP04080 EPI\_ISL\_15 B.1.1.519 N:R203K,N:G204R,N:V350F,ORF1a:T224I,ORF1a:P959S,ORF1a:L1243P,ORF1a:T3255I,ORF1a:I3618V,ORF1a:T417  
 HP04124 EPI\_ISL\_15 B.1.1.7 N:M1X,N:D ORF1a:S3675-,ORF1a:G3676-,ORF1a:F3677-,S:H69-,S:V70-,S:Y144-  
 HP04125 EPI\_ISL\_15 B.1.1.7 N:M1X,N:D ORF1a:S3675-,ORF1a:G3676-,ORF1a:F3677-,S:H69-,S:V70-,S:Y144-  
 HP04126 EPI\_ISL\_15 B.1.526.1 N:M1X,N:T ORF1a:S3675-,ORF1a:G3676-,ORF1a:F3677-,S:Y144-  
 HP04127 EPI\_ISL\_19 B.1.1.7 N:M1X,N:D ORF1a:S3675-,ORF1a:G3676-,ORF1a:F3677-,ORF7a:S60-,ORF7a:T61-,ORF7a:Q62-,ORF7a:F63-,ORF7a  
 HP04128 EPI\_ISL\_15 B.1.1.7 N:M1X,N:D ORF1a:S3675-,ORF1a:G3676-,ORF1a:F3677-,S:H69-,S:V70-,S:Y144-  
 HP04149 EPI\_ISL\_15 B.1.1.7 N:M1X,N:D ORF1a:S3675-,ORF1a:G3676-,ORF1a:F3677-,S:H69-,S:V70-,S:Y144-  
 HP04150 EPI\_ISL\_15 B.1.1.7 N:M1X,N:D ORF1a:S3675-,ORF1a:G3676-,ORF1a:F3677-,S:H69-,S:V70-,S:Y144-  
 HP04154 EPI\_ISL\_15 B.1.526 N:M1X,N:P ORF1a:S3675-,ORF1a:G3676-,ORF1a:F3677-  
 HP04184 EPI\_ISL\_15 B.1.1.7 N:M1X,N:D ORF1a:S3675-,ORF1a:G3676-,ORF1a:F3677-,S:H69-,S:V70-,S:Y144-  
 HP04186 EPI\_ISL\_15 R.1 M:F28L,N:M1X,N:S187L,N:R203K,N:G204R,N:Q418H,ORF1a:A2584T,ORF1b:P314L,ORF1b:V1144L,ORF1b:G1362  
 HP04187 EPI\_ISL\_15 B.1.1.7 N:M1X,N:D ORF1a:S3675-,ORF1a:G3676-,ORF1a:F3677-,S:H69-,S:V70-,S:Y144-  
 HP04188 EPI\_ISL\_15 B.1.561 N:S194L,N:M234I,ORF1a:V751L,ORF1a:A1082V,ORF1a:I1274F,ORF1a:I1912V,ORF1a:K3353R,ORF1b:P314L,ORF1  
 HP04190 EPI\_ISL\_16 B.1.1.7 N:M1X,N:D ORF1a:S3675-,ORF1a:G3676-,ORF1a:F3677-,S:H69-,S:V70-,S:Y144-  
 HP04193 EPI\_ISL\_19 B.1.1.7 N:M1X,N:D ORF1a:S3675-,ORF1a:G3676-,ORF1a:F3677-,ORF7a:S60-,ORF7a:T61-,ORF7a:Q62-,ORF7a:F63-,ORF7a  
 HP04195 EPI\_ISL\_16 B.1.1.7 N:M1X,N:D ORF1a:S3675-,ORF1a:G3676-,ORF1a:F3677-,S:H69-,S:V70-,S:Y144-  
 HP04196 EPI\_ISL\_16 B.1.1.7 N:M1X,N:D ORF1a:S3675-,ORF1a:G3676-,ORF1a:F3677-,S:H69-,S:V70-,S:Y144-  
 HP04205 EPI\_ISL\_16 B.1.1.7 N:M1X,N:D ORF1a:S3675-,ORF1a:G3676-,ORF1a:F3677-,S:H69-,S:V70-,S:Y144-  
 HP04509 EPI\_ISL\_16 B.1.1.7 N:M1X,N:D ORF1a:S3675-,ORF1a:G3676-,ORF1a:F3677-,ORF3a:V256-,S:H69-,S:V70-,S:Y144-  
 HP04510 EPI\_ISL\_16 B.1.1.7 N:M1X,N:D ORF1a:S3675-,ORF1a:G3676-,ORF1a:F3677-,S:H69-,S:V70-,S:Y144-  
 HP04511 EPI\_ISL\_16 B.1.1.7 N:M1X,N:D ORF1a:S3675-,ORF1a:G3676-,ORF1a:F3677-,S:H69-,S:V70-,S:Y144-  
 HP04512 EPI\_ISL\_16 B.1.1.7 N:M1X,N:D ORF1a:S3675-,ORF1a:G3676-,ORF1a:F3677-,S:H69-,S:V70-,S:Y144-  
 HP04513 EPI\_ISL\_16 P.1 N:P80R,N:F ORF1a:S3675-,ORF1a:G3676-,ORF1a:F3677-  
 HP04514 EPI\_ISL\_16 B.1.1.7 N:M1X,N:D ORF1a:S3675-,ORF1a:G3676-,ORF1a:F3677-,S:H69-,S:V70-,S:Y144-  
 HP04515 EPI\_ISL\_16 B.1.1.7 N:M1X,N:D ORF1a:S3675-,ORF1a:G3676-,ORF1a:F3677-,S:H69-,S:V70-,S:Y144-  
 HP04516 EPI\_ISL\_16 B.1.1.7 N:M1X,N:D ORF1a:S3675-,ORF1a:G3676-,ORF1a:F3677-,S:H69-,S:V70-,S:Y144-  
 HP04517 EPI\_ISL\_16 B.1.1.7 N:M1X,N:D ORF1a:S3675-,ORF1a:G3676-,ORF1a:F3677-,S:H69-,S:V70-,S:Y144-  
 HP04520 EPI\_ISL\_16 B.1.1.7 M:V23I,N:I ORF1a:S3675-,ORF1a:G3676-,ORF1a:F3677-,S:H69-,S:V70-,S:Y144-  
 HP04521 EPI\_ISL\_16 B.1.351 E:P71L,N:T ORF1a:S3675-,ORF1a:G3676-,ORF1a:F3677-,S:A243-,S:L244-,S:H245-  
 HP04522 EPI\_ISL\_16 B.1.243 N:S194L,N:I337V,ORF1a:V438A,ORF1a:G2118Y,ORF1a:N2523T,ORF1b:P314L,ORF1b:A576V,ORF3a:T151I,S:D614  
 HP04523 EPI\_ISL\_16 B.1.1.7 N:M1X,N:D ORF1a:S3675-,ORF1a:G3676-,ORF1a:F3677-,S:H69-,S:V70-,S:Y144-

HP04524 EPI\_ISL\_16 B.1.1.7 N:M1X,N:D ORF1a:S3675-,ORF1a:G3676-,ORF1a:F3677-,S:H69-,S:V70-,S:Y144-  
 HP04527 EPI\_ISL\_16 B.1.1.7 N:M1X,N:D ORF1a:S3675-,ORF1a:G3676-,ORF1a:F3677-,S:H69-,S:V70-,S:Y144-  
 HP04538 EPI\_ISL\_16 B.1.1.7 N:M1X,N:D ORF1a:S3675-,ORF1a:G3676-,ORF1a:F3677-,S:H69-,S:V70-,S:Y144-  
 HP04555 EPI\_ISL\_16 B.1.1.7 N:M1X,N:D ORF1a:S3675-,ORF1a:G3676-,ORF1a:F3677-,S:H69-,S:V70-,S:Y144-  
 HP04556 EPI\_ISL\_16 B.1.1.7 N:M1X,N:D ORF1a:S3675-,ORF1a:G3676-,ORF1a:F3677-,S:H69-,S:V70-,S:Y144-  
 HP04557 EPI\_ISL\_16 B.1.111 N:T205I,N:K387R,ORF1a:I114T,ORF1a:M1312I,ORF1b:P314L,ORF1b:V1840F,ORF3a:G44E,ORF3a:Q57H,ORF3a:T:  
 HP04558 EPI\_ISL\_16 B.1.1.7 N:M1X,N:D ORF1a:S3675-,ORF1a:G3676-,ORF1a:F3677-,S:H69-,S:V70-,S:Y144-  
 HP04559 EPI\_ISL\_16 R.1 M:F28L,N:M1X,N:S187L,N:R203K,N:G204R,N:Q418H,ORF1a:S1510F,ORF1a:T1854I,ORF1a:A2584T,ORF1b:P314L  
 HP04560 EPI\_ISL\_16 B.1.1.7 N:M1X,N:D ORF1a:S3675-,ORF1a:G3676-,ORF1a:F3677-,S:H69-,S:V70-,S:Y144-  
 HP04561 EPI\_ISL\_19 B.1.1.7 N:M1X,N:D ORF1a:S3675-,ORF1a:G3676-,ORF1a:F3677-,S:H69-,S:V70-,S:Y144-  
 HP04562 EPI\_ISL\_16 B.1.1.7 N:M1X,N:D ORF1a:S3675-,ORF1a:G3676-,ORF1a:F3677-,S:H69-,S:V70-,S:Y144-  
 HP04563 EPI\_ISL\_16 B.1.1.7 N:M1X,N:D ORF1a:S3675-,ORF1a:G3676-,ORF1a:F3677-,S:H69-,S:V70-,S:Y144-  
 HP04569 EPI\_ISL\_23 B.1.1.7 N:M1X,N:D ORF1a:S3675-,ORF1a:G3676-,ORF1a:F3677-,S:H69-,S:V70-,S:Y144-  
 HP04570 EPI\_ISL\_23 B.1.1.7 N:M1X,N:D ORF1a:S3675-,ORF1a:G3676-,ORF1a:F3677-,S:H69-,S:V70-,S:Y144-  
 HP04578 EPI\_ISL\_19 B.1.1.318 M:I82T,N:RN:R209-,ORF1a:S3675-,ORF1a:G3676-,ORF1a:F3677-,ORF8:M1-,ORF8:K2-,S:Y144-  
 HP04579 EPI\_ISL\_23 B.1.1.7 N:M1X,N:D ORF1a:S3675-,ORF1a:G3676-,ORF1a:F3677-,S:H69-,S:V70-,S:Y144-  
 HP04581 EPI\_ISL\_23 B.1.1.519 N:R203K,N ORF3a:T14-,ORF3a:L15-  
 HP04582 EPI\_ISL\_23 B.1.427 N:D144H,N:T205I,ORF1a:T265I,ORF1a:S3158T,ORF1b:P314L,ORF1b:P976L,ORF1b:D1183Y,ORF3a:Q57H,ORF3a:  
 HP04583 EPI\_ISL\_23 B.1.526.1 N:M1X,N:T ORF1a:S3675-,ORF1a:G3676-,ORF1a:F3677-  
 HP04588 EPI\_ISL\_23 B.1.526.1 N:M1X,N:T ORF1a:S3675-,ORF1a:G3676-,ORF1a:F3677-,S:Y144-  
 HP04594 EPI\_ISL\_23 B.1.526 N:M1X,N:R ORF1a:S3675-,ORF1a:G3676-,ORF1a:F3677-  
 HP04596 EPI\_ISL\_23 B.1.1.7 N:M1X,N:D ORF1a:S3675-,ORF1a:G3676-,ORF1a:F3677-,S:H69-,S:V70-,S:Y144-  
 HP04597 EPI\_ISL\_23 B.1.526.1 N:M1X,N:T ORF1a:S3675-,ORF1a:G3676-,ORF1a:F3677-  
 HP04600 EPI\_ISL\_23 B.1.1.7 N:M1X,N:D ORF1a:S3675-,ORF1a:G3676-,ORF1a:F3677-,S:H69-,S:V70-,S:Y144-  
 HP04603 pending B.1.1.7 N:M1X,N:D ORF1a:S3675-,ORF1a:G3676-,ORF1a:F3677-,S:H69-,S:V70-,S:Y144-  
 HP04604 EPI\_ISL\_23 B.1.526.1 N:M1X,N:T ORF1a:S3675-,ORF1a:G3676-,ORF1a:F3677-  
 HP04659 EPI\_ISL\_16 B.1.1.1 N:P13L,N:R ORF1a:S3675-,ORF1a:G3676-,ORF1a:F3677-,ORF3a:L108-  
 HP04661 EPI\_ISL\_16 B.1.1.7 N:M1X,N:D ORF1a:S3675-,ORF1a:G3676-,ORF1a:F3677-,S:H69-,S:V70-,S:Y144-  
 HP04663 EPI\_ISL\_16 B.1.526 N:M1X,N:D ORF1a:S3675-,ORF1a:G3676-,ORF1a:F3677-  
 HP04664 EPI\_ISL\_16 B.1.526 N:M1X,N:P ORF1a:S3675-,ORF1a:G3676-,ORF1a:F3677-  
 HP04684 EPI\_ISL\_19 B.1.526 N:M1X,N:P ORF1a:S3675-,ORF1a:G3676-,ORF1a:F3677-  
 HP04721 EPI\_ISL\_18 B.1.351 E:P71L,N:T ORF1a:S3675-,ORF1a:G3676-,ORF1a:F3677-,S:A243-,S:L244-,S:H245-  
 HP04722 EPI\_ISL\_18 B.1.351 E:P71L,N:T ORF1a:S3675-,ORF1a:G3676-,ORF1a:F3677-,S:A243-,S:L244-,S:H245-  
 HP04723 pending B.1.526.1 N:M1X,N:T ORF1a:S3675-,ORF1a:G3676-,ORF1a:F3677-,ORF6:D61-



|         |            |           |                                                                                                     |
|---------|------------|-----------|-----------------------------------------------------------------------------------------------------|
| HP04940 | EPI_ISL_18 | B.1.1.7   | N:M1X,N:D ORF1a:S3675-,ORF1a:G3676-,ORF1a:F3677-,S:H69-,S:V70-,S:Y144-                              |
| HP04941 | EPI_ISL_19 | B.1.1.7   | N:M1X,N:D ORF1a:S3675-,ORF1a:G3676-,ORF1a:F3677-,S:H69-,S:V70-,S:Y144-                              |
| HP04942 | EPI_ISL_19 | B.1.1.7   | N:M1X,N:D ORF1a:H83-,ORF1a:V84-,ORF1a:M85-,ORF1a:V86-,ORF1a:E87-,ORF1a:S3675-,ORF1a:G3676-,ORF1a:   |
| HP04967 | EPI_ISL_21 | B.1.1.7   | N:M1X,N:D ORF1a:S3675-,ORF1a:G3676-,ORF1a:F3677-,S:H69-,S:V70-,S:Y144-                              |
| HP04986 | EPI_ISL_19 | B.1.525   | E:L21X,M:I N:D3-,ORF1a:S3675-,ORF1a:G3676-,ORF1a:F3677-,ORF6:F2-,S:H69-,S:V70-,S:Y144-              |
| HP04987 | EPI_ISL_19 | B.1.1.7   | N:M1X,N:D ORF1a:S3675-,ORF1a:G3676-,ORF1a:F3677-,S:H69-,S:V70-,S:Y144-                              |
| HP04988 | EPI_ISL_19 | B.1.1.7   | N:M1X,N:D ORF1a:S3675-,ORF1a:G3676-,ORF1a:F3677-,S:H69-,S:V70-,S:Y144-                              |
| HP04990 | EPI_ISL_19 | B.1.1.7   | N:M1X,N:D ORF1a:S3675-,ORF1a:G3676-,ORF1a:F3677-,S:H69-,S:V70-,S:Y144-                              |
| HP04996 | EPI_ISL_19 | B.1.1.7   | N:M1X,N:D ORF1a:S3675-,ORF1a:G3676-,ORF1a:F3677-,ORF7a:S60-,ORF7a:T61-,ORF7a:Q62-,ORF7a:F63-,ORF7a: |
| HP04997 | EPI_ISL_19 | B.1.1.7   | N:M1X,N:D ORF1a:S3675-,ORF1a:G3676-,ORF1a:F3677-,ORF7a:S60-,ORF7a:T61-,ORF7a:Q62-,ORF7a:F63-,ORF7a: |
| HP04998 | EPI_ISL_19 | B.1.1.7   | N:M1X,N:D ORF1a:S3675-,ORF1a:G3676-,ORF1a:F3677-,S:H69-,S:V70-,S:Y144-                              |
| HP05001 | EPI_ISL_19 | B.1.1.7   | N:M1X,N:D ORF1a:S3675-,ORF1a:G3676-,ORF1a:F3677-,S:H69-,S:V70-,S:Y144-                              |
| HP05003 | EPI_ISL_19 | B.1.1.7   | N:M1X,N:D ORF1a:S3675-,ORF1a:G3676-,ORF1a:F3677-,S:H69-,S:V70-,S:Y144-                              |
| HP05005 | EPI_ISL_19 | B.1.1.7   | N:M1X,N:D ORF1a:S3675-,ORF1a:G3676-,ORF1a:F3677-,S:H69-,S:V70-,S:Y144-                              |
| HP05006 | EPI_ISL_19 | B.1.1.7   | N:M1X,N:D ORF1a:S3675-,ORF1a:G3676-,ORF1a:F3677-,S:H69-,S:V70-,S:Y144-                              |
| HP05017 | EPI_ISL_19 | B.1.526.1 | N:M1X,N:T ORF1a:S3675-,ORF1a:G3676-,ORF1a:F3677-                                                    |
| HP05018 | EPI_ISL_19 | B.1.1.7   | N:M1X,N:D ORF1a:S3675-,ORF1a:G3676-,ORF1a:F3677-,S:H69-,S:V70-,S:Y144-                              |
| HP05020 | EPI_ISL_19 | B.1.1.7   | N:M1X,N:D ORF1a:S3675-,ORF1a:G3676-,ORF1a:F3677-,S:H69-,S:V70-,S:Y144-                              |
| HP05021 | EPI_ISL_19 | B.1.1.7   | N:M1X,N:D ORF1a:S3675-,ORF1a:G3676-,ORF1a:F3677-,S:H69-,S:V70-,S:Y144-                              |
| HP05026 | EPI_ISL_19 | B.1.620   | N:A220V,O ORF1a:S3675-,ORF1a:G3676-,ORF1a:F3677-,ORF7b:L14-,S:H69-,S:V70-,S:Y144-,S:L242-,S:A243-   |
| HP05027 | EPI_ISL_19 | B.1.1.7   | N:M1X,N:D ORF1a:S3675-,ORF1a:G3676-,ORF1a:F3677-,S:H69-,S:V70-,S:Y144-                              |
| HP05034 | EPI_ISL_19 | B.1.1.7   | N:M1X,N:D ORF1a:S3675-,ORF1a:G3676-,ORF1a:F3677-,S:H69-,S:V70-,S:Y144-                              |
| HP05043 | EPI_ISL_19 | B.1.1.7   | N:M1X,N:D ORF1a:S3675-,ORF1a:G3676-,ORF1a:F3677-,S:H69-,S:V70-,S:Y144-                              |
| HP05046 | EPI_ISL_19 | B.1.1.7   | N:M1X,N:D ORF1a:S3675-,ORF1a:G3676-,ORF1a:F3677-,S:H69-,S:V70-,S:Y144-                              |
| HP05050 | EPI_ISL_19 | B.1.1.7   | N:M1X,N:D ORF1a:S3675-,ORF1a:G3676-,ORF1a:F3677-,S:H69-,S:V70-,S:Y144-                              |
| HP05051 | EPI_ISL_19 | B.1.1.7   | N:M1X,N:D ORF1a:S3675-,ORF1a:G3676-,ORF1a:F3677-,S:H69-,S:V70-,S:Y144-                              |
| HP05052 | EPI_ISL_19 | B.1.1.7   | N:M1X,N:D ORF1a:S3675-,ORF1a:G3676-,ORF1a:F3677-,S:H69-,S:V70-,S:Y144-                              |
| HP05053 | EPI_ISL_19 | B.1.526   | N:M1X,N:P ORF1a:S3675-,ORF1a:G3676-,ORF1a:F3677-                                                    |
| HP05054 | EPI_ISL_19 | B.1.1.7   | M:H125Y,N ORF1a:S3675-,ORF1a:G3676-,ORF1a:F3677-,S:H69-,S:V70-,S:Y144-                              |
| HP05056 | EPI_ISL_19 | B.1.427   | N:T205I,ORF1a:T265I,ORF1a:T2877I,ORF1a:S3158T,ORF1b:P314L,ORF1b:P976L,ORF1b:D1183Y,ORF1b:E1623D,I   |
| HP05065 | EPI_ISL_19 | B.1.1.7   | N:M1X,N:D ORF1a:S3675-,ORF1a:G3676-,ORF1a:F3677-,S:H69-,S:V70-,S:Y144-                              |
| HP05071 | EPI_ISL_19 | P.1       | N:P80R,N:F ORF1a:S3675-,ORF1a:G3676-,ORF1a:F3677-                                                   |
| HP05075 | EPI_ISL_19 | B.1.1.7   | N:M1X,N:D ORF1a:S3675-,ORF1a:G3676-,ORF1a:F3677-,S:H69-,S:V70-,S:Y144-                              |
| HP05080 | pending    | B.1.1.7   | N:M1X,N:D ORF1a:S3675-,ORF1a:G3676-,ORF1a:F3677-,ORF8:S67-,S:H69-,S:V70-,S:Y144-                    |



HP05081 EPI\_ISL\_19 B.1.1.434 N:R203K,N:G204R,ORF1a:T224I,ORF1a:I693V,ORF1a:Q998H,ORF1a:M1312I,ORF1a:L3776F,ORF1b:P314L,ORF1b  
HP05082 EPI\_ISL\_19 B.1.526.1 N:M1X,N:T ORF1a:S3675-,ORF1a:G3676-,ORF1a:F3677-  
HP05085 EPI\_ISL\_19 B.1.1.7 N:M1X,N:D ORF1a:S3675-,ORF1a:G3676-,ORF1a:F3677-,S:H69-,S:V70-,S:Y144-  
HP05087 EPI\_ISL\_19 B.1.1.7 N:M1X,N:D ORF1a:S3675-,ORF1a:G3676-,ORF1a:F3677-,S:H69-,S:V70-,S:Y144-  
HP05088 EPI\_ISL\_19 B.1.1.7 N:M1X,N:D ORF1a:S3675-,ORF1a:G3676-,ORF1a:F3677-,S:H69-,S:V70-,S:Y144-  
HP05089 EPI\_ISL\_19 B.1.526.1 N:M1X,N:T ORF1a:S3675-,ORF1a:G3676-,ORF1a:F3677-  
HP05091 EPI\_ISL\_19 B.1.526.1 N:M1X,N:T ORF1a:S3675-,ORF1a:G3676-,ORF1a:F3677-,S:Y144-  
HP05092 EPI\_ISL\_19 B.1.1.7 N:M1X,N:D ORF1a:S3675-,ORF1a:G3676-,ORF1a:F3677-,S:H69-,S:V70-,S:Y144-  
HP05095 EPI\_ISL\_19 B.1.1.7 N:M1X,N:D ORF1a:S3675-,ORF1a:G3676-,ORF1a:F3677-,S:H69-,S:V70-,S:Y144-  
HP05097 EPI\_ISL\_19 B.1.526 N:M1X,N:D ORF1a:S3675-,ORF1a:G3676-,ORF1a:F3677-  
HP05099 EPI\_ISL\_19 B.1.1.7 N:M1X,N:D ORF1a:S3675-,ORF1a:G3676-,ORF1a:F3677-,S:H69-,S:V70-,S:Y144-  
HP05104 EPI\_ISL\_19 B.1.1.7 N:M1X,N:D ORF1a:S3675-,ORF1a:G3676-,ORF1a:F3677-,S:H69-,S:V70-,S:Y144-  
HP05118 EPI\_ISL\_19 B.1.1.7 N:M1X,N:D ORF1a:S3675-,ORF1a:G3676-,ORF1a:F3677-,S:H69-,S:V70-,S:Y144-  
HP05126 EPI\_ISL\_19 B.1.1.7 N:M1X,N:D ORF1a:S3675-,ORF1a:G3676-,ORF1a:F3677-,S:H69-,S:V70-,S:Y144-  
HP05127 EPI\_ISL\_19 B.1.1.7 N:M1X,N:D ORF1a:S3675-,ORF1a:G3676-,ORF1a:F3677-,S:H69-,S:V70-,S:Y144-  
HP05128 EPI\_ISL\_19 B.1.1.7 N:M1X,N:D ORF1a:S3675-,ORF1a:G3676-,ORF1a:F3677-,S:H69-,S:V70-,S:Y144-  
HP05161 EPI\_ISL\_19 B.1.526.1 N:M1X,N:T ORF1a:S3675-,ORF1a:G3676-,ORF1a:F3677-  
HP05166 EPI\_ISL\_19 B.1.1.7 N:M1X,N:D ORF1a:S3675-,ORF1a:G3676-,ORF1a:F3677-,ORF7a:V108-,ORF7a:F109-,ORF7a:T111-,ORF7a:L112-,C  
HP05169 EPI\_ISL\_19 B.1.1.7 N:M1X,N:D ORF1a:S3675-,ORF1a:G3676-,ORF1a:F3677-,S:H69-,S:V70-,S:Y144-  
HP05174 EPI\_ISL\_21 B.1.1.7 N:M1X,N:D ORF1a:S3675-,ORF1a:G3676-,ORF1a:F3677-,ORF8:D119-,S:H69-,S:V70-,S:Y144-  
HP05175 EPI\_ISL\_19 B.1.1.7 N:M1X,N:D ORF1a:S3675-,ORF1a:G3676-,ORF1a:F3677-,S:H69-,S:V70-,S:Y144-  
HP05176 pending B.1.525 E:L21X,M:I N:D3-,ORF1a:S3675-,ORF1a:G3676-,ORF1a:F3677-,ORF6:F2-,S:H69-,S:V70-,S:Y144-  
HP05177 EPI\_ISL\_19 B.1.234 N:S194L,N:D371Y,N:T391I,N:S412N,ORF1a:R287S,ORF1a:I453T,ORF1a:V665I,ORF1a:T1682I,ORF1a:K2059R,ORF  
HP05178 EPI\_ISL\_19 B.1.526.1 N:M1X,N:T ORF1a:S3675-,ORF1a:G3676-,ORF1a:F3677-  
HP05189 EPI\_ISL\_19 B.1.1.7 N:M1X,N:D ORF1a:S3675-,ORF1a:G3676-,ORF1a:F3677-,S:H69-,S:V70-,S:Y144-  
HP05190 EPI\_ISL\_19 B.1.1.7 N:M1X,N:D ORF1a:S3675-,ORF1a:G3676-,ORF1a:F3677-,S:H69-,S:V70-,S:Y144-  
HP05193 EPI\_ISL\_19 B.1.1.7 N:M1X,N:D ORF1a:S3675-,ORF1a:G3676-,ORF1a:F3677-,S:H69-,S:V70-,S:Y144-  
HP05195 EPI\_ISL\_19 R.1 M:F28L,N:I S:H69-,S:V70-,S:Y144-  
HP05198 EPI\_ISL\_19 B.1.1.7 N:M1X,N:D ORF1a:S3675-,ORF1a:G3676-,ORF1a:F3677-,S:H69-,S:V70-,S:Y144-  
HP05199 EPI\_ISL\_21 B.1.1.7 N:M1X,N:D ORF1a:S3675-,ORF1a:G3676-,ORF1a:F3677-,S:H69-,S:V70-,S:Y144-  
HP05200 EPI\_ISL\_19 B.1.1.7 N:M1X,N:D ORF1a:H83-,ORF1a:V84-,ORF1a:M85-,ORF1a:V86-,ORF1a:E87-,ORF1a:S3675-,ORF1a:G3676-,ORF1a:  
HP05203 EPI\_ISL\_19 B.1.1.7 N:M1X,N:D ORF1a:S3675-,ORF1a:G3676-,ORF1a:F3677-,S:H69-,S:V70-,S:Y144-  
HP05204 EPI\_ISL\_19 B.1.526.1 N:M1X,N:T ORF1a:S3675-,ORF1a:G3676-,ORF1a:F3677-  
HP05210 EPI\_ISL\_19 B.1.1.7 N:M1X,N:D ORF1a:S3675-,ORF1a:G3676-,ORF1a:F3677-,S:H69-,S:V70-,S:Y144-

|         |            |           |                                                                                                           |
|---------|------------|-----------|-----------------------------------------------------------------------------------------------------------|
| HP05212 | EPI_ISL_19 | B.1.526.2 | N:M1X,N:P ORF1a:S3675-,ORF1a:G3676-,ORF1a:F3677-                                                          |
| HP05250 | EPI_ISL_21 | B.1.1.7   | N:M1X,N:D ORF1a:S3675-,ORF1a:G3676-,ORF1a:F3677-,S:H69-,S:V70-,S:Y144-                                    |
| HP05287 | EPI_ISL_21 | B.1.1.7   | N:M1X,N:D ORF1a:S3675-,ORF1a:G3676-,ORF1a:F3677-,S:H69-,S:V70-,S:Y144-                                    |
| HP05289 | EPI_ISL_21 | B.1.1.7   | N:M1X,N:D ORF1a:S3675-,ORF1a:G3676-,ORF1a:F3677-,S:H69-,S:V70-,S:Y144-                                    |
| HP05299 | EPI_ISL_22 | B.1.1.7   | N:M1X,N:D ORF1a:S3675-,ORF1a:G3676-,ORF1a:F3677-,S:H69-,S:V70-,S:Y144-                                    |
| HP05300 | EPI_ISL_21 | B.1.1.7   | ORF1a:T10 ORF1a:S3675-,ORF1a:G3676-,ORF1a:F3677-,S:H69-,S:V70-,S:Y144-                                    |
| HP05302 | EPI_ISL_22 | B.1.1.7   | N:M1X,N:D ORF1a:S3675-,ORF1a:G3676-,ORF1a:F3677-,S:H69-,S:V70-,S:Y144-                                    |
| HP05303 | EPI_ISL_22 | B.1.1.7   | N:M1X,N:D ORF1a:S3675-,ORF1a:G3676-,ORF1a:F3677-,S:H69-,S:V70-,S:Y144-                                    |
| HP05307 | EPI_ISL_21 | B.1.1.7   | N:M1X,N:D ORF1a:S3675-,ORF1a:G3676-,ORF1a:F3677-,S:H69-,S:V70-,S:Y144-                                    |
| HP05308 | EPI_ISL_21 | B.1.1.7   | N:M1X,N:D ORF1a:S3675-,ORF1a:G3676-,ORF1a:F3677-,S:H69-,S:V70-,S:Y144-                                    |
| HP05309 | EPI_ISL_21 | B.1.1.7   | N:M1X,N:D ORF1a:S3675-,ORF1a:G3676-,ORF1a:F3677-,S:H69-,S:V70-,S:Y144-                                    |
| HP05310 | EPI_ISL_22 | B.1.1.7   | N:M1X,N:D ORF1a:S3675-,ORF1a:G3676-,ORF1a:F3677-,S:H69-,S:V70-,S:Y144-                                    |
| HP05311 | EPI_ISL_22 | B.1.1.7   | N:M1X,N:D ORF1a:S3675-,ORF1a:G3676-,ORF1a:F3677-,S:H69-,S:V70-,S:Y144-                                    |
| HP05312 | EPI_ISL_22 | B.1.1.7   | N:M1X,N:D ORF1a:S3675-,ORF1a:G3676-,ORF1a:F3677-,S:H69-,S:V70-,S:Y144-                                    |
| HP05319 | EPI_ISL_22 | B.1.1.7   | N:M1X,N:D ORF1a:S3675-,ORF1a:G3676-,ORF1a:F3677-,S:H69-,S:V70-,S:Y144-                                    |
| HP05325 | EPI_ISL_22 | B.1.1.7   | N:M1X,N:D ORF1a:S3675-,ORF1a:G3676-,ORF1a:F3677-,S:H69-,S:V70-,S:Y144-                                    |
| HP05326 | pending    | B.1.1.7   | N:M1X,N:D ORF1a:S3675-,ORF1a:G3676-,ORF1a:F3677-,ORF7a:S60-,ORF7a:T61-,ORF7a:Q62-,ORF7a:F63-,ORF7a:       |
| HP05327 | EPI_ISL_22 | B.1.1.7   | N:M1X,N:D ORF1a:S3675-,ORF1a:G3676-,ORF1a:F3677-,S:H69-,S:V70-,S:Y144-                                    |
| HP05332 | EPI_ISL_22 | B.1.1.7   | N:M1X,N:D ORF1a:S3675-,ORF1a:G3676-,ORF1a:F3677-,S:H69-,S:V70-,S:Y144-,S:L242-,S:A243-,S:L244-,S:H245-,S: |
| HP05334 | EPI_ISL_22 | B.1.1.7   | N:M1X,N:D ORF1a:S3675-,ORF1a:G3676-,ORF1a:F3677-,S:H69-,S:V70-,S:Y144-                                    |
| HP05348 | EPI_ISL_22 | B.1.1.7   | N:M1X,N:D ORF1a:S3675-,ORF1a:G3676-,ORF1a:F3677-,S:H69-,S:V70-,S:Y144-                                    |
| HP05349 | EPI_ISL_22 | B.1.1.7   | N:M1X,N:D ORF1a:S3675-,ORF1a:G3676-,ORF1a:F3677-,S:H69-,S:V70-,S:Y144-                                    |
| HP05356 | EPI_ISL_22 | B.1.1.7   | N:M1X,N:D ORF1a:S3675-,ORF1a:G3676-,ORF1a:F3677-,S:H69-,S:V70-,S:Y144-                                    |
| HP05357 | EPI_ISL_22 | B.1.526   | N:M1X,N:P ORF1a:S3675-,ORF1a:G3676-,ORF1a:F3677-                                                          |
| HP05359 | EPI_ISL_22 | B.1       | N:M1X,N:T ORF1a:S3675-,ORF1a:G3676-,ORF1a:F3677-                                                          |
| HP05361 | EPI_ISL_22 | B.1.1.7   | N:M1X,N:D ORF1a:S3675-,ORF1a:G3676-,ORF1a:F3677-,ORF3a:V256-,S:H69-,S:V70-,S:Y144-                        |
| HP05363 | EPI_ISL_22 | B.1.1.7   | N:M1X,N:D ORF1a:S3675-,ORF1a:G3676-,ORF1a:F3677-,S:H69-,S:V70-,S:Y144-,S:L242-,S:A243-,S:L244-,S:H245-,S: |
| HP05395 | EPI_ISL_23 | B.1.1.7   | N:M1X,N:D ORF1a:S3675-,ORF1a:G3676-,ORF1a:F3677-,S:H69-,S:V70-,S:Y144-                                    |
| HP05396 | pending    | B.1.1.7   | N:M1X,N:D ORF1a:S3675-,ORF1a:G3676-,ORF1a:F3677-,S:H69-,S:V70-,S:Y144-                                    |
| HP05398 | EPI_ISL_23 | B.1.1.7   | N:M1X,N:D ORF1a:S3675-,ORF1a:G3676-,ORF1a:F3677-,S:H69-,S:V70-,S:Y144-                                    |
| HP05399 | pending    | B.1.1.7   | N:M1X,N:D ORF1a:S3675-,ORF1a:G3676-,ORF1a:F3677-,S:H69-,S:V70-,S:Y144-                                    |
| HP05403 | EPI_ISL_23 | B.1.1.7   | M:A69S,N:I ORF1a:S3675-,ORF1a:G3676-,ORF1a:F3677-,S:H69-,S:V70-,S:Y144-                                   |
| HP05407 | EPI_ISL_23 | B.1.1.7   | N:M1X,N:D ORF1a:S3675-,ORF1a:G3676-,ORF1a:F3677-,S:H69-,S:V70-,S:Y144-                                    |
| HP05408 | EPI_ISL_23 | B.1.1.7   | N:M1X,N:D ORF1a:S3675-,ORF1a:G3676-,ORF1a:F3677-,S:H69-,S:V70-,S:Y144-                                    |

|         |            |           |                                                                                                  |
|---------|------------|-----------|--------------------------------------------------------------------------------------------------|
| HP05411 | EPI_ISL_23 | B.1.1.7   | N:M1X,N:D ORF1a:S3675-,ORF1a:G3676-,ORF1a:F3677-,S:H69-,S:V70-,S:Y144-                           |
| HP05417 | EPI_ISL_23 | B.1.1.7   | N:M1X,N:D ORF1a:S3675-,ORF1a:G3676-,ORF1a:F3677-,S:H69-,S:V70-,S:Y144-                           |
| HP05422 | EPI_ISL_23 | B.1.526.3 | N:M1X,N:P ORF1a:S3675-,ORF1a:G3676-,ORF1a:F3677-                                                 |
| HP05424 | EPI_ISL_23 | B.1.1.7   | N:M1X,N:D ORF1a:S3675-,ORF1a:G3676-,ORF1a:F3677-,S:H69-,S:V70-,S:Y144-                           |
| HP05425 | EPI_ISL_23 | B.1.1.7   | N:M1X,N:D ORF1a:S3675-,ORF1a:G3676-,ORF1a:F3677-,S:H69-,S:V70-,S:Y144-                           |
| HP05429 | EPI_ISL_23 | B.1.1.7   | N:M1X,N:D ORF1a:S3675-,ORF1a:G3676-,ORF1a:F3677-,S:H69-,S:V70-,S:Y144-                           |
| HP05432 | EPI_ISL_23 | B.1.1.7   | N:M1X,N:D ORF1a:S3675-,ORF1a:G3676-,ORF1a:F3677-,S:H69-,S:V70-,S:Y144-                           |
| HP05433 | EPI_ISL_23 | B.1.1.7   | N:M1X,N:D ORF1a:S3675-,ORF1a:G3676-,ORF1a:F3677-,S:H69-,S:V70-,S:Y144-                           |
| HP05434 | EPI_ISL_23 | B.1.1.7   | N:M1X,N:D ORF1a:S3675-,ORF1a:G3676-,ORF1a:F3677-,S:H69-,S:V70-,S:Y144-                           |
| HP05441 | EPI_ISL_23 | B.1.1.7   | N:M1X,N:D ORF1a:S3675-,ORF1a:G3676-,ORF1a:F3677-,S:H69-,S:V70-,S:Y144-                           |
| HP05443 | EPI_ISL_23 | B.1.1.7   | N:M1X,N:D ORF1a:S3675-,ORF1a:G3676-,ORF1a:F3677-,S:H69-,S:V70-,S:Y144-                           |
| HP05448 | EPI_ISL_23 | B.1.1.7   | N:M1X,N:D ORF1a:S3675-,ORF1a:G3676-,ORF1a:F3677-,S:H69-,S:V70-,S:Y144-                           |
| HP05449 | EPI_ISL_23 | B.1.1.7   | N:M1X,N:D ORF1a:S3675-,ORF1a:G3676-,ORF1a:F3677-,S:H69-,S:V70-,S:Y144-                           |
| HP05452 | EPI_ISL_23 | B.1.526.1 | N:M1X,N:T ORF1a:S3675-,ORF1a:G3676-,ORF1a:F3677-,S:Y144-                                         |
| HP05455 | EPI_ISL_23 | B.1.1.7   | N:M1X,N:D ORF1a:S3675-,ORF1a:G3676-,ORF1a:F3677-,S:H69-,S:V70-,S:Y144-                           |
| HP05456 | EPI_ISL_23 | B.1.1.7   | N:M1X,N:D ORF1a:S3675-,ORF1a:G3676-,ORF1a:F3677-,S:H69-,S:V70-,S:Y144-                           |
| HP05458 | EPI_ISL_23 | B.1.427   | N:A90S,N:T205I,ORF1a:T265I,ORF1a:A1352V,ORF1a:S3158T,ORF1a:G3546S,ORF1b:P314L,ORF1b:P976L,ORF1b: |
| HP05462 | EPI_ISL_23 | B.1.1.7   | N:M1X,N:D ORF1a:S3675-,ORF1a:G3676-,ORF1a:F3677-,S:H69-,S:V70-,S:Y144-                           |
| HP05472 | EPI_ISL_23 | B.1.1.7   | N:M1X,N:D ORF1a:S3675-,ORF1a:G3676-,ORF1a:F3677-,S:H69-,S:V70-,S:Y144-                           |
| HP05511 | EPI_ISL_21 | B.1.1.7   | N:M1X,N:D ORF1a:S3675-,ORF1a:G3676-,ORF1a:F3677-,S:H69-,S:V70-,S:Y144-                           |
| HP05537 | EPI_ISL_22 | B.1.1.7   | N:M1X,N:D ORF1a:S3675-,ORF1a:G3676-,ORF1a:F3677-,ORF8:L60-,S:H69-,S:V70-,S:Y144-                 |
| HP05539 | EPI_ISL_21 | B.1.526.1 | N:M1X,N:T ORF1a:S3675-,ORF1a:G3676-,ORF1a:F3677-,S:Y144-                                         |
| HP05540 | EPI_ISL_21 | B.1.1.7   | E:F26L,N:V ORF1a:S3675-,ORF1a:G3676-,ORF1a:F3677-,S:H69-,S:V70-,S:Y144-                          |
| HP05543 | EPI_ISL_21 | B.1.1.7   | N:M1X,N:D ORF1a:S3675-,ORF1a:G3676-,ORF1a:F3677-,S:H69-,S:V70-,S:Y144-                           |
| HP05550 | EPI_ISL_21 | B.1.526   | N:M1X,N:P ORF1a:S3675-,ORF1a:G3676-,ORF1a:F3677-                                                 |
| HP05560 | EPI_ISL_21 | B.1.1.7   | N:M1X,N:D ORF1a:S3675-,ORF1a:G3676-,ORF1a:F3677-,S:H69-,S:V70-,S:Y144-                           |
| HP05563 | EPI_ISL_22 | B.1.1.7   | N:M1X,N:D ORF1a:S3675-,ORF1a:G3676-,ORF1a:F3677-,S:H69-,S:V70-,S:Y144-                           |
| HP05567 | EPI_ISL_21 | B.1.1.7   | N:M1X,N:D ORF1a:S3675-,ORF1a:G3676-,ORF1a:F3677-,S:H69-,S:V70-,S:Y144-                           |
| HP05569 | EPI_ISL_21 | B.1.1.7   | N:M1X,N:D ORF1a:S3675-,ORF1a:G3676-,ORF1a:F3677-,S:H69-,S:V70-,S:Y144-                           |
| HP05571 | EPI_ISL_21 | B.1.526.1 | N:M1X,N:T ORF1a:S3675-,ORF1a:G3676-,ORF1a:F3677-                                                 |
| HP05572 | EPI_ISL_22 | B.1.1.7   | N:M1X,N:D ORF1a:S3675-,ORF1a:G3676-,ORF1a:F3677-,S:H69-,S:V70-,S:Y144-                           |
| HP05573 | EPI_ISL_21 | B.1.1.7   | N:M1X,N:D ORF1a:S3675-,ORF1a:G3676-,ORF1a:F3677-,S:H69-,S:V70-,S:Y144-                           |
| HP05574 | EPI_ISL_21 | B.1.1.7   | N:M1X,N:D ORF1a:S3675-,ORF1a:G3676-,ORF1a:F3677-,S:H69-,S:V70-,S:Y144-                           |
| HP05575 | EPI_ISL_21 | B.1.1.7   | N:M1X,N:D ORF1a:S3675-,ORF1a:G3676-,ORF1a:F3677-,S:H69-,S:V70-,S:Y144-                           |

HP05589 EPI\_ISL\_21 B.1.526.1 N:M1X,N:T ORF1a:S3675-,ORF1a:G3676-,ORF1a:F3677-,S:Y144-  
HP05590 EPI\_ISL\_21 B.1.1.7 N:M1X,N:D ORF1a:S3675-,ORF1a:G3676-,ORF1a:F3677-,S:H69-,S:V70-,S:Y144-  
HP05591 EPI\_ISL\_21 B.1.526.1 N:M1X,N:T ORF1a:S3675-,ORF1a:G3676-,ORF1a:F3677-  
HP05593 EPI\_ISL\_21 B.1.526.1 N:M1X,N:T ORF1a:S3675-,ORF1a:G3676-,ORF1a:F3677-,S:Y144-  
HP05594 EPI\_ISL\_21 B.1.1.7 N:M1X,N:D ORF1a:S3675-,ORF1a:G3676-,ORF1a:F3677-,S:H69-,S:V70-,S:Y144-  
HP05597 EPI\_ISL\_22 B.1.1.7 N:M1X,N:D ORF1a:S3675-,ORF1a:G3676-,ORF1a:F3677-,S:H69-,S:V70-,S:Y144-  
HP05598 EPI\_ISL\_22 B.1.1.7 N:M1X,N:D ORF1a:S3675-,ORF1a:G3676-,ORF1a:F3677-,S:H69-,S:V70-,S:Y144-  
HP05599 EPI\_ISL\_22 B.1 N:M1X,N:S ORF1a:L3674-,ORF3a:V256-  
HP05644 pending B.1.1.7 N:M1X,N:D ORF1a:S3675-,ORF1a:G3676-,ORF1a:F3677-,ORF3a:V256-,S:H69-,S:V70-,S:Y144-  
HP05645 pending B.1.1.7 N:M1X,N:D ORF1a:S3675-,ORF1a:G3676-,ORF1a:F3677-,ORF3a:V256-,S:H69-,S:V70-,S:Y144-  
HP05648 EPI\_ISL\_23 B.1.1.7 N:M1X,N:D ORF1a:S3675-,ORF1a:G3676-,ORF1a:F3677-,S:H69-,S:V70-,S:Y144-  
HP05653 EPI\_ISL\_23 B.1.1.7 N:M1X,N:D ORF1a:S3675-,ORF1a:G3676-,ORF1a:F3677-,S:H69-,S:V70-,S:Y144-  
HP05654 EPI\_ISL\_23 B.1.1.7 N:M1X,N:D ORF1a:S3675-,ORF1a:G3676-,ORF1a:F3677-,S:H69-,S:V70-,S:Y144-  
HP05655 EPI\_ISL\_23 B.1.1.7 N:M1X,N:D ORF1a:S3675-,ORF1a:G3676-,ORF1a:F3677-,S:H69-,S:V70-,S:Y144-  
HP05659 EPI\_ISL\_23 P.1 N:P80R,N:F ORF1a:S3675-,ORF1a:G3676-,ORF1a:F3677-  
HP05660 EPI\_ISL\_23 B.1.617.2 M:I82T,N:N ORF8:D119-,ORF8:F120-,S:F157-,S:R158-  
HP05661 EPI\_ISL\_23 B.1.1 N:M1X,N:R ORF8:D119-,ORF8:F120-,S:H69-,S:V70-,S:Y144-,S:F157-,S:R158-  
HP05676 EPI\_ISL\_23 B.1.526.1 N:M1X,N:T ORF1a:S3675-,ORF1a:G3676-,ORF1a:F3677-  
HP05678 EPI\_ISL\_23 B.1.1.7 N:M1X,N:D ORF1a:S3675-,ORF1a:G3676-,ORF1a:F3677-,S:H69-,S:V70-,S:Y144-  
HP05679 EPI\_ISL\_23 B.1.1.7 N:M1X,N:D ORF1a:S3675-,ORF1a:G3676-,ORF1a:F3677-,S:H69-,S:V70-,S:Y144-  
HP05680 EPI\_ISL\_23 B.1.1.7 N:M1X,N:D ORF1a:S3675-,ORF1a:G3676-,ORF1a:F3677-,S:H69-,S:V70-,S:Y144-  
HP05681 EPI\_ISL\_23 B.1.1.7 N:M1X,N:D ORF1a:S3675-,ORF1a:G3676-,ORF1a:F3677-,S:H69-,S:V70-,S:Y144-  
HP05682 EPI\_ISL\_23 B.1.1.7 N:M1X,N:D ORF1a:S3675-,ORF1a:G3676-,ORF1a:F3677-,S:H69-,S:V70-,S:Y144-  
HP05684 EPI\_ISL\_23 B.1.1.7 N:M1X,N:D ORF1a:S3675-,ORF1a:G3676-,ORF1a:F3677-,S:H69-,S:V70-,S:Y144-  
HP05693 EPI\_ISL\_23 B.1.1.7 N:M1X,N:D ORF1a:S3675-,ORF1a:G3676-,ORF1a:F3677-,S:H69-,S:V70-,S:Y144-  
HP05694 EPI\_ISL\_23 B.1.1.7 N:M1X,N:D ORF1a:S3675-,ORF1a:G3676-,ORF1a:F3677-,S:H69-,S:V70-,S:Y144-  
HP05701 EPI\_ISL\_23 B.1.1.7 N:M1X,N:D ORF1a:S3675-,ORF1a:G3676-,ORF1a:F3677-,S:H69-,S:V70-,S:Y144-  
HP05705 EPI\_ISL\_23 B.1.526.1 N:M1X,N:T ORF1a:S3675-,ORF1a:G3676-,ORF1a:F3677-  
HP05723 EPI\_ISL\_23 B.1.526 N:M1X,N:P ORF1a:S3675-,ORF1a:G3676-,ORF1a:F3677-  
HP05724 EPI\_ISL\_23 B.1.1.7 N:M1X,N:D ORF1a:S3675-,ORF1a:G3676-,ORF1a:F3677-,S:H69-,S:V70-,S:Y144-  
HP05767 EPI\_ISL\_22 B.1.1.7 N:M1X,N:D ORF1a:S3675-,ORF1a:G3676-,ORF1a:F3677-,S:H69-,S:V70-,S:Y144-  
HP05768 EPI\_ISL\_22 B.1.1.7 N:M1X,N:D ORF1a:S3675-,ORF1a:G3676-,ORF1a:F3677-,S:H69-,S:V70-,S:Y144-  
HP05772 EPI\_ISL\_22 B.1.1.7 N:M1X,N:D ORF1a:S3675-,ORF1a:G3676-,ORF1a:F3677-,S:H69-,S:V70-,S:Y144-  
HP05774 EPI\_ISL\_22 B.1.1.7 N:M1X,N:D ORF1a:S3675-,ORF1a:G3676-,ORF1a:F3677-,S:H69-,S:V70-,S:Y144-

|         |            |           |                                                                                                    |
|---------|------------|-----------|----------------------------------------------------------------------------------------------------|
| HP05775 | EPI_ISL_22 | A.23.1    | N:S2Y,N:S202N,N:R203K,ORF1a:T350N,ORF1a:T654I,ORF1a:T2846I,ORF1a:L3338F,ORF1a:M3655I,ORF1a:L3667   |
| HP05776 | EPI_ISL_22 | B.1.1.7   | N:M1X,N:D ORF1a:S3675-,ORF1a:G3676-,ORF1a:F3677-,S:H69-,S:V70-,S:Y144-                             |
| HP05777 | EPI_ISL_22 | B.1.1.7   | N:M1X,N:D ORF1a:S3675-,ORF1a:G3676-,ORF1a:F3677-,S:H69-,S:V70-,S:Y144-                             |
| HP05797 | EPI_ISL_22 | B.1.1.7   | N:M1X,N:D ORF1a:S3675-,ORF1a:G3676-,ORF1a:F3677-,S:H69-,S:V70-,S:Y144-                             |
| HP05802 | EPI_ISL_22 | B.1.1.7   | N:M1X,N:D ORF1a:S3675-,ORF1a:G3676-,ORF1a:F3677-,S:H69-,S:V70-,S:Y144-                             |
| HP05807 | EPI_ISL_22 | B.1.1.7   | N:M1X,N:D ORF1a:S3675-,ORF1a:G3676-,ORF1a:F3677-,S:H69-,S:V70-,S:Y144-                             |
| HP05810 | EPI_ISL_22 | B.1.1.7   | N:M1X,N:D ORF1a:S3675-,ORF1a:G3676-,ORF1a:F3677-,S:H69-,S:V70-,S:Y144-                             |
| HP05817 | EPI_ISL_22 | B.1.1.7   | N:R203K,N ORF1a:S3675-,ORF1a:G3676-,ORF1a:F3677-,S:H69-,S:V70-,S:Y144-                             |
| HP05818 | EPI_ISL_22 | B.1.1.7   | N:M1X,N:D ORF1a:S3675-,ORF1a:G3676-,ORF1a:F3677-,S:H69-,S:V70-,S:Y144-                             |
| HP05824 | EPI_ISL_22 | B.1.1.7   | N:M1X,N:D ORF1a:S3675-,ORF1a:G3676-,ORF1a:F3677-,S:H69-,S:V70-,S:Y144-                             |
| HP06072 | EPI_ISL_23 | B.1.1.7   | N:M1X,N:D ORF1a:S3675-,ORF1a:G3676-,ORF1a:F3677-,S:H69-,S:V70-,S:Y144-                             |
| HP06073 | EPI_ISL_23 | B.1.1.7   | N:M1X,N:D ORF1a:S3675-,ORF1a:G3676-,ORF1a:F3677-,S:H69-,S:V70-,S:Y144-                             |
| HP06074 | EPI_ISL_23 | B.1.1.7   | N:M1X,N:D ORF1a:S3675-,ORF1a:G3676-,ORF1a:F3677-,S:H69-,S:V70-,S:Y144-                             |
| HP06075 | EPI_ISL_23 | B.1.1.7   | N:M1X,N:D ORF1a:S3675-,ORF1a:G3676-,ORF1a:F3677-,S:H69-,S:V70-,S:Y144-                             |
| HP06078 | EPI_ISL_23 | B.1.1.7   | N:M1X,N:D ORF1a:S3675-,ORF1a:G3676-,ORF1a:F3677-,S:H69-,S:V70-,S:Y144-                             |
| HP06111 | EPI_ISL_23 | B.1.1.7   | N:M1X,N:D ORF1a:S3675-,ORF1a:G3676-,ORF1a:F3677-,S:H69-,S:V70-,S:Y144-                             |
| HP06113 | EPI_ISL_23 | B.1.1.7   | N:M1X,N:D ORF1a:S3675-,ORF1a:G3676-,ORF1a:F3677-,S:H69-,S:V70-,S:Y144-                             |
| HP06114 | EPI_ISL_23 | B.1.1.7   | N:M1X,N:D ORF1a:S3675-,ORF1a:G3676-,ORF1a:F3677-,S:H69-,S:V70-,S:Y144-                             |
| HP06235 | pending    | B.1.2     | M:A83T,N:P67S,N:A414S,ORF1a:T760I,ORF1a:I2076T,ORF1a:M2606I,ORF1a:L3352F,ORF1a:V4073I,ORF1b:K82R   |
| HP06243 | pending    | B.1.1.7   | N:M1X,N:D ORF1a:S3675-,ORF1a:G3676-,ORF1a:F3677-,S:H69-,S:V70-,S:Y144-                             |
| HP06245 | pending    | B.1.1.7   | N:M1X,N:D ORF1a:S3675-,ORF1a:G3676-,ORF1a:F3677-,ORF6:K23-,ORF6:V24-,ORF6:S25-,ORF6:I26-,ORF6:W27- |
| HP06247 | pending    | B.1.1.7   | N:M1X,N:D ORF1a:S3675-,ORF1a:G3676-,ORF1a:F3677-,S:H69-,S:V70-,S:Y144-                             |
| HP06258 | pending    | B.1.1.7   | N:M1X,N:D ORF1a:S3675-,ORF1a:G3676-,ORF1a:F3677-,S:H69-,S:V70-,S:Y144-                             |
| HP06261 | pending    | B.1.1.7   | N:M1X,N:D ORF1a:S3675-,ORF1a:G3676-,ORF1a:F3677-,S:H69-,S:V70-,S:Y144-                             |
| HP06262 | pending    | B.1.1.7   | N:M1X,N:D ORF1a:S3675-,ORF1a:G3676-,ORF1a:F3677-,S:H69-,S:V70-,S:Y144-                             |
| HP06271 | pending    | B.1.1.7   | N:M1X,N:D ORF1a:S3675-,ORF1a:G3676-,ORF1a:F3677-,S:H69-,S:V70-,S:Y144-                             |
| HP06272 | pending    | B.1.1.7   | N:M1X,N:D ORF1a:S3675-,ORF1a:G3676-,ORF1a:F3677-,S:H69-,S:V70-,S:Y144-                             |
| HP06273 | pending    | B.1.526.2 | N:M1X,ORI ORF1a:S3675-,ORF1a:G3676-,ORF1a:F3677-                                                   |
| HP06274 | pending    | B.1.525   | E:L21X,M:I N:D3-,ORF1a:S3675-,ORF1a:G3676-,ORF1a:F3677-,ORF6:F2-,S:H69-,S:V70-,S:Y144-             |
| HP06276 | pending    | B.1.1.7   | N:M1X,N:D ORF1a:S3675-,ORF1a:G3676-,ORF1a:F3677-,S:H69-,S:V70-,S:Y144-                             |
| HP06281 | pending    | B.1.1.7   | N:M1X,N:D ORF1a:S3675-,ORF1a:G3676-,ORF1a:F3677-,S:H69-,S:V70-,S:Y144-                             |
| HP06302 | pending    | B.1.2     | N:P67S,N:P199L,N:H300Y,ORF1a:D203N,ORF1a:T265I,ORF1a:M2606I,ORF1a:L3352F,ORF1a:R3993L,ORF1b:P31-   |

Supplemental Table 4

|           | outcome | Lineage   | c        | p value  | dof | expected                                                          |
|-----------|---------|-----------|----------|----------|-----|-------------------------------------------------------------------|
| <b>0</b>  | Control | B.1.1.486 | 0.768827 | 0.38058  | 1   | [[6.48293963e+01 1.70603675e-01] [3.15170604e+02 8.29396325e-01]] |
| <b>1</b>  | Control | B.1.1.7   | 2.337644 | 0.12628  | 1   | [[ 15.69553806 49.30446194] [ 76.30446194 239.69553806]]          |
| <b>2</b>  | Control | B.1.2     | 0.271578 | 0.602275 | 1   | [[ 63.97637795 1.02362205] [311.02362205 4.97637795]]             |
| <b>3</b>  | Control | B.1.214.2 | 0.768827 | 0.38058  | 1   | [[6.48293963e+01 1.70603675e-01] [3.15170604e+02 8.29396325e-01]] |
| <b>4</b>  | Control | B.1.234   | 0.768827 | 0.38058  | 1   | [[6.48293963e+01 1.70603675e-01] [3.15170604e+02 8.29396325e-01]] |
| <b>5</b>  | Control | B.1.243   | 0.000331 | 0.985479 | 1   | [[ 64.48818898 0.51181102] [313.51181102 2.48818898]]             |
| <b>6</b>  | Control | B.1.311   | 0.768827 | 0.38058  | 1   | [[6.48293963e+01 1.70603675e-01] [3.15170604e+02 8.29396325e-01]] |
| <b>7</b>  | Control | B.1.351   | 0.096163 | 0.756484 | 1   | [[ 63.80577428 1.19422572] [310.19422572 5.80577428]]             |
| <b>8</b>  | Control | B.1.427   | 0.000331 | 0.985479 | 1   | [[ 64.48818898 0.51181102] [313.51181102 2.48818898]]             |
| <b>9</b>  | Control | B.1.525   | 0.000331 | 0.985479 | 1   | [[ 64.48818898 0.51181102] [313.51181102 2.48818898]]             |
| <b>10</b> | Control | B.1.526   | 8.084124 | 0.004465 | 1   | [[ 61.92913386 3.07086614] [301.07086614 14.92913386]]            |
| <b>11</b> | Control | B.1.526.1 | 1.83817  | 0.175166 | 1   | [[ 58.51706037 6.48293963] [284.48293963 31.51706037]]            |
| <b>12</b> | Control | B.1.526.3 | 0.089571 | 0.764724 | 1   | [[ 64.65879265 0.34120735] [314.34120735 1.65879265]]             |
| <b>13</b> | Control | B.1.596   | 0.768827 | 0.38058  | 1   | [[6.48293963e+01 1.70603675e-01] [3.15170604e+02 8.29396325e-01]] |
| <b>14</b> | Control | B.1.620   | 0.089571 | 0.764724 | 1   | [[ 64.65879265 0.34120735] [314.34120735 1.65879265]]             |
| <b>15</b> | Control | P.1       | 0.599516 | 0.438763 | 1   | [[ 64.14698163 0.85301837] [311.85301837 4.14698163]]             |
| <b>16</b> | Vax     | B.1.1.486 | 0.768827 | 0.38058  | 1   | [[3.15170604e+02 8.29396325e-01] [6.48293963e+01 1.70603675e-01]] |
| <b>17</b> | Vax     | B.1.1.7   | 2.337644 | 0.12628  | 1   | [[ 76.30446194 239.69553806] [ 15.69553806 49.30446194]]          |
| <b>18</b> | Vax     | B.1.2     | 0.271578 | 0.602275 | 1   | [[311.02362205 4.97637795] [ 63.97637795 1.02362205]]             |
| <b>19</b> | Vax     | B.1.214.2 | 0.768827 | 0.38058  | 1   | [[3.15170604e+02 8.29396325e-01] [6.48293963e+01 1.70603675e-01]] |
| <b>20</b> | Vax     | B.1.234   | 0.768827 | 0.38058  | 1   | [[3.15170604e+02 8.29396325e-01] [6.48293963e+01 1.70603675e-01]] |
| <b>21</b> | Vax     | B.1.243   | 0.000331 | 0.985479 | 1   | [[313.51181102 2.48818898] [ 64.48818898 0.51181102]]             |
| <b>22</b> | Vax     | B.1.311   | 0.768827 | 0.38058  | 1   | [[3.15170604e+02 8.29396325e-01] [6.48293963e+01 1.70603675e-01]] |
| <b>23</b> | Vax     | B.1.351   | 0.096163 | 0.756484 | 1   | [[310.19422572 5.80577428] [ 63.80577428 1.19422572]]             |
| <b>24</b> | Vax     | B.1.427   | 0.000331 | 0.985479 | 1   | [[313.51181102 2.48818898] [ 64.48818898 0.51181102]]             |
| <b>25</b> | Vax     | B.1.525   | 0.000331 | 0.985479 | 1   | [[313.51181102 2.48818898] [ 64.48818898 0.51181102]]             |
| <b>26</b> | Vax     | B.1.526   | 8.084124 | 0.004465 | 1   | [[301.07086614 14.92913386] [ 61.92913386 3.07086614]]            |
| <b>27</b> | Vax     | B.1.526.1 | 1.83817  | 0.175166 | 1   | [[284.48293963 31.51706037] [ 58.51706037 6.48293963]]            |
| <b>28</b> | Vax     | B.1.526.3 | 0.089571 | 0.764724 | 1   | [[314.34120735 1.65879265] [ 64.65879265 0.34120735]]             |
| <b>29</b> | Vax     | B.1.596   | 0.768827 | 0.38058  | 1   | [[3.15170604e+02 8.29396325e-01] [6.48293963e+01 1.70603675e-01]] |

|           |     |         |          |          |   |                |             |               |              |
|-----------|-----|---------|----------|----------|---|----------------|-------------|---------------|--------------|
| <b>30</b> | Vax | B.1.620 | 0.089571 | 0.764724 | 1 | [[314.34120735 | 1.65879265] | [ 64.65879265 | 0.34120735]] |
| <b>31</b> | Vax | P.1     | 0.599516 | 0.438763 | 1 | [[311.85301837 | 4.14698163] | [ 64.14698163 | 0.85301837]] |

Supplemental Table 5

|           | mut     | c        | total vaccinat | total Contr | p value         | dof | expected                                                      |
|-----------|---------|----------|----------------|-------------|-----------------|-----|---------------------------------------------------------------|
| <b>0</b>  | S:L5X   | 7.364885 | 5              | 4           | <b>0.006651</b> | 1   | [[327.5 65.5] [ 7.5 1.5]]                                     |
| <b>1</b>  | S:L5F   | 9.65119  | 10             | 14          | <b>0.001892</b> | 1   | [[315. 63.] [ 20. 4.]]                                        |
| <b>2</b>  | S:S13I  | 0.050503 | 0              | 4           | 0.822191        | 1   | [[331.66666667 66.33333333] [ 3.33333333 0.66666667]]         |
| <b>3</b>  | S:L18F  | 0.154615 | 3              | 9           | 0.694163        | 1   | [[325. 65.] [ 10. 2.]]                                        |
| <b>4</b>  | S:L18R  | 0.1005   | 0              | 2           | 0.75123         | 1   | [[333.33333333 66.66666667] [ 1.66666667 0.33333333]]         |
| <b>5</b>  | S:T19R  | 0.1005   | 0              | 2           | 0.75123         | 1   | [[333.33333333 66.66666667] [ 1.66666667 0.33333333]]         |
| <b>6</b>  | S:T20N  | 0.64806  | 2              | 3           | 0.420807        | 1   | [[330.83333333 66.16666667] [ 4.16666667 0.83333333]]         |
| <b>7</b>  | S:T22I  | 0.801995 | 0              | 1           | 0.370498        | 1   | [[3.34166667e+02 6.68333333e+01] [8.33333333e-01 1.66666667e- |
| <b>8</b>  | S:Q23R  | 0.1005   | 1              | 1           | 0.75123         | 1   | [[333.33333333 66.66666667] [ 1.66666667 0.33333333]]         |
| <b>9</b>  | S:P26S  | 1.860976 | 3              | 4           | 0.172512        | 1   | [[329.16666667 65.83333333] [ 5.83333333 1.16666667]]         |
| <b>10</b> | S:A27V  | 0.801995 | 0              | 1           | 0.370498        | 1   | [[3.34166667e+02 6.68333333e+01] [8.33333333e-01 1.66666667e- |
| <b>11</b> | S:T29I  | 0.801995 | 0              | 1           | 0.370498        | 1   | [[3.34166667e+02 6.68333333e+01] [8.33333333e-01 1.66666667e- |
| <b>12</b> | S:H49Y  | 0.162015 | 0              | 5           | 0.687308        | 1   | [[330.83333333 66.16666667] [ 4.16666667 0.83333333]]         |
| <b>13</b> | S:A67S  | 0.1005   | 1              | 1           | 0.75123         | 1   | [[333.33333333 66.66666667] [ 1.66666667 0.33333333]]         |
| <b>14</b> | S:A67V  | 0        | 0              | 3           | 1               | 1   | [[332.5 66.5] [ 2.5 0.5]]                                     |
| <b>15</b> | S:H69Y  | 0.801995 | 0              | 1           | 0.370498        | 1   | [[3.34166667e+02 6.68333333e+01] [8.33333333e-01 1.66666667e- |
| <b>16</b> | S:H69-  | 1.355546 | 45             | 251         | 0.244311        | 1   | [[ 88.33333333 17.66666667] [246.66666667 49.33333333]]       |
| <b>17</b> | S:V70-  | 1.355546 | 45             | 251         | 0.244311        | 1   | [[ 88.33333333 17.66666667] [246.66666667 49.33333333]]       |
| <b>18</b> | S:G75V  | 0.801995 | 0              | 1           | 0.370498        | 1   | [[3.34166667e+02 6.68333333e+01] [8.33333333e-01 1.66666667e- |
| <b>19</b> | S:T76I  | 0.801995 | 0              | 1           | 0.370498        | 1   | [[3.34166667e+02 6.68333333e+01] [8.33333333e-01 1.66666667e- |
| <b>20</b> | S:R78M  | 0.1005   | 1              | 1           | 0.75123         | 1   | [[333.33333333 66.66666667] [ 1.66666667 0.33333333]]         |
| <b>21</b> | S:F79L  | 0.1005   | 1              | 1           | 0.75123         | 1   | [[333.33333333 66.66666667] [ 1.66666667 0.33333333]]         |
| <b>22</b> | S:D80A  | 0.116311 | 2              | 5           | 0.73307         | 1   | [[329.16666667 65.83333333] [ 5.83333333 1.16666667]]         |
| <b>23</b> | S:D80G  | 0.63769  | 0              | 8           | 0.424548        | 1   | [[328.33333333 65.66666667] [ 6.66666667 1.33333333]]         |
| <b>24</b> | S:T95I  | 10.95774 | 12             | 18          | <b>0.000932</b> | 1   | [[310. 62.] [ 25. 5.]]                                        |
| <b>25</b> | S:S98F  | 0.050503 | 0              | 4           | 0.822191        | 1   | [[331.66666667 66.33333333] [ 3.33333333 0.66666667]]         |
| <b>26</b> | S:V126A | 0.1005   | 1              | 1           | 0.75123         | 1   | [[333.33333333 66.66666667] [ 1.66666667 0.33333333]]         |
| <b>27</b> | S:D138Y | 0.116311 | 2              | 5           | 0.73307         | 1   | [[329.16666667 65.83333333] [ 5.83333333 1.16666667]]         |
| <b>28</b> | S:D138H | 0.050503 | 0              | 4           | 0.822191        | 1   | [[331.66666667 66.33333333] [ 3.33333333 0.66666667]]         |
| <b>29</b> | S:V143F | 0.801995 | 0              | 1           | 0.370498        | 1   | [[3.34166667e+02 6.68333333e+01] [8.33333333e-01 1.66666667e- |



|           |         |          |    |     |          |   |                                                               |
|-----------|---------|----------|----|-----|----------|---|---------------------------------------------------------------|
| <b>30</b> | S:Y144- | 2.782816 | 45 | 260 | 0.095281 | 1 | [[ 80.83333333 16.16666667] [254.16666667 50.83333333]]       |
| <b>31</b> | S:W152C | 0.050503 | 0  | 4   | 0.822191 | 1 | [[331.66666667 66.33333333] [ 3.33333333 0.66666667]]         |
| <b>32</b> | S:W152L | 0        | 0  | 3   | 1        | 1 | [[332.5 66.5] [ 2.5 0.5]]                                     |
| <b>33</b> | S:S155R | 1.789618 | 2  | 29  | 0.180973 | 1 | [[309.16666667 61.83333333] [ 25.83333333 5.16666667]]        |
| <b>34</b> | S:E156G | 0.1005   | 0  | 2   | 0.75123  | 1 | [[333.33333333 66.66666667] [ 1.66666667 0.33333333]]         |
| <b>35</b> | S:F157S | 2.690984 | 2  | 34  | 0.100918 | 1 | [[305. 61.] [ 30. 6.]]                                        |
| <b>36</b> | S:F157L | 0.801995 | 0  | 1   | 0.370498 | 1 | [[3.34166667e+02 6.68333333e+01] [8.33333333e-01 1.66666667e- |
| <b>37</b> | S:F157- | 0.1005   | 0  | 2   | 0.75123  | 1 | [[333.33333333 66.66666667] [ 1.66666667 0.33333333]]         |
| <b>38</b> | S:R158S | 0.1005   | 0  | 2   | 0.75123  | 1 | [[333.33333333 66.66666667] [ 1.66666667 0.33333333]]         |
| <b>39</b> | S:R158- | 0.1005   | 0  | 2   | 0.75123  | 1 | [[333.33333333 66.66666667] [ 1.66666667 0.33333333]]         |
| <b>40</b> | S:D178Y | 0        | 1  | 8   | 1        | 1 | [[327.5 65.5] [ 7.5 1.5]]                                     |
| <b>41</b> | S:G181R | 0.1005   | 1  | 1   | 0.75123  | 1 | [[333.33333333 66.66666667] [ 1.66666667 0.33333333]]         |
| <b>42</b> | S:R190S | 0        | 1  | 2   | 1        | 1 | [[332.5 66.5] [ 2.5 0.5]]                                     |
| <b>43</b> | S:D215G | 0.116311 | 2  | 5   | 0.73307  | 1 | [[329.16666667 65.83333333] [ 5.83333333 1.16666667]]         |
| <b>44</b> | S:D215H | 0.801995 | 0  | 1   | 0.370498 | 1 | [[3.34166667e+02 6.68333333e+01] [8.33333333e-01 1.66666667e- |
| <b>45</b> | S:S221L | 0.050503 | 1  | 3   | 0.822191 | 1 | [[331.66666667 66.33333333] [ 3.33333333 0.66666667]]         |
| <b>46</b> | S:A222V | 0        | 0  | 3   | 1        | 1 | [[332.5 66.5] [ 2.5 0.5]]                                     |
| <b>47</b> | S:I235V | 0.801995 | 0  | 1   | 0.370498 | 1 | [[3.34166667e+02 6.68333333e+01] [8.33333333e-01 1.66666667e- |
| <b>48</b> | S:L242H | 0.116311 | 2  | 5   | 0.73307  | 1 | [[329.16666667 65.83333333] [ 5.83333333 1.16666667]]         |
| <b>49</b> | S:L242- | 0.050503 | 1  | 3   | 0.822191 | 1 | [[331.66666667 66.33333333] [ 3.33333333 0.66666667]]         |
| <b>50</b> | S:A243- | 0.299093 | 3  | 8   | 0.584451 | 1 | [[325.83333333 65.16666667] [ 9.16666667 1.83333333]]         |
| <b>51</b> | S:L244X | 0.1005   | 1  | 1   | 0.75123  | 1 | [[333.33333333 66.66666667] [ 1.66666667 0.33333333]]         |
| <b>52</b> | S:L244- | 0        | 2  | 7   | 1        | 1 | [[327.5 65.5] [ 7.5 1.5]]                                     |
| <b>53</b> | S:H245X | 0.1005   | 1  | 1   | 0.75123  | 1 | [[333.33333333 66.66666667] [ 1.66666667 0.33333333]]         |
| <b>54</b> | S:H245- | 0        | 2  | 7   | 1        | 1 | [[327.5 65.5] [ 7.5 1.5]]                                     |
| <b>55</b> | S:R246- | 0.1005   | 0  | 2   | 0.75123  | 1 | [[333.33333333 66.66666667] [ 1.66666667 0.33333333]]         |
| <b>56</b> | S:D253G | 9.04387  | 9  | 12  | 0.002636 | 1 | [[317.5 63.5] [ 17.5 3.5]]                                    |
| <b>57</b> | S:S254F | 0.801995 | 0  | 1   | 0.370498 | 1 | [[3.34166667e+02 6.68333333e+01] [8.33333333e-01 1.66666667e- |
| <b>58</b> | S:S255F | 0.801995 | 0  | 1   | 0.370498 | 1 | [[3.34166667e+02 6.68333333e+01] [8.33333333e-01 1.66666667e- |
| <b>59</b> | S:W258L | 0.1005   | 0  | 2   | 0.75123  | 1 | [[333.33333333 66.66666667] [ 1.66666667 0.33333333]]         |
| <b>60</b> | S:T323I | 0.801995 | 0  | 1   | 0.370498 | 1 | [[3.34166667e+02 6.68333333e+01] [8.33333333e-01 1.66666667e- |
| <b>61</b> | S:V327I | 0.162015 | 0  | 5   | 0.687308 | 1 | [[330.83333333 66.16666667] [ 4.16666667 0.83333333]]         |

|           |         |          |    |     |          |   |                                                                   |
|-----------|---------|----------|----|-----|----------|---|-------------------------------------------------------------------|
| <b>62</b> | S:V367F | 0.1005   | 0  | 2   | 0.75123  | 1 | [[333.33333333 66.66666667] [ 1.66666667 0.33333333]]             |
| <b>63</b> | S:P384L | 0.1005   | 1  | 1   | 0.75123  | 1 | [[333.33333333 66.66666667] [ 1.66666667 0.33333333]]             |
| <b>64</b> | S:K417N | 0.116311 | 2  | 5   | 0.73307  | 1 | [[329.16666667 65.83333333] [ 5.83333333 1.16666667]]             |
| <b>65</b> | S:K417T | 0.64806  | 2  | 3   | 0.420807 | 1 | [[330.83333333 66.16666667] [ 4.16666667 0.83333333]]             |
| <b>66</b> | S:D427G | 0.801995 | 0  | 1   | 0.370498 | 1 | [[3.34166667e+02 6.68333333e+01] [8.33333333e-01 1.66666667e-01]] |
| <b>67</b> | S:N440K | 0.1005   | 0  | 2   | 0.75123  | 1 | [[333.33333333 66.66666667] [ 1.66666667 0.33333333]]             |
| <b>68</b> | S:L452R | 2.881422 | 2  | 35  | 0.089607 | 1 | [[304.16666667 60.83333333] [ 30.83333333 6.16666667]]            |
| <b>69</b> | S:L452Q | 0.801995 | 0  | 1   | 0.370498 | 1 | [[3.34166667e+02 6.68333333e+01] [8.33333333e-01 1.66666667e-01]] |
| <b>70</b> | S:L452M | 0.801995 | 0  | 1   | 0.370498 | 1 | [[3.34166667e+02 6.68333333e+01] [8.33333333e-01 1.66666667e-01]] |
| <b>71</b> | S:S477N | 0.050503 | 1  | 3   | 0.822191 | 1 | [[331.66666667 66.33333333] [ 3.33333333 0.66666667]]             |
| <b>72</b> | S:T478K | 0        | 0  | 3   | 1        | 1 | [[332.5 66.5] [ 2.5 0.5]]                                         |
| <b>73</b> | S:E484K | 8.691305 | 14 | 27  | 0.003197 | 1 | [[300.83333333 60.16666667] [ 34.16666667 6.83333333]]            |
| <b>74</b> | S:F490S | 0.801995 | 0  | 1   | 0.370498 | 1 | [[3.34166667e+02 6.68333333e+01] [8.33333333e-01 1.66666667e-01]] |
| <b>75</b> | S:S494P | 0        | 1  | 8   | 1        | 1 | [[327.5 65.5] [ 7.5 1.5]]                                         |
| <b>76</b> | S:N501Y | 0.657115 | 42 | 230 | 0.41758  | 1 | [[108.33333333 21.66666667] [226.66666667 45.33333333]]           |
| <b>77</b> | S:A570D | 1.079934 | 44 | 244 | 0.298712 | 1 | [[ 95. 19.] [240. 48.]]                                           |
| <b>78</b> | S:T572I | 0.801995 | 0  | 1   | 0.370498 | 1 | [[3.34166667e+02 6.68333333e+01] [8.33333333e-01 1.66666667e-01]] |
| <b>79</b> | S:D574Y | 0.801995 | 0  | 1   | 0.370498 | 1 | [[3.34166667e+02 6.68333333e+01] [8.33333333e-01 1.66666667e-01]] |
| <b>80</b> | S:Q613H | 0.801995 | 0  | 1   | 0.370498 | 1 | [[3.34166667e+02 6.68333333e+01] [8.33333333e-01 1.66666667e-01]] |
| <b>81</b> | S:D614G | 0.801995 | 67 | 334 | 0.370498 | 1 | [[8.33333333e-01 1.66666667e-01] [3.34166667e+02 6.68333333e+01]] |
| <b>82</b> | S:A623S | 0.801995 | 0  | 1   | 0.370498 | 1 | [[3.34166667e+02 6.68333333e+01] [8.33333333e-01 1.66666667e-01]] |
| <b>83</b> | S:H655Y | 0.64806  | 2  | 3   | 0.420807 | 1 | [[330.83333333 66.16666667] [ 4.16666667 0.83333333]]             |
| <b>84</b> | S:Q677H | 0.304545 | 2  | 4   | 0.581047 | 1 | [[330. 66.] [ 5. 1.]]                                             |
| <b>85</b> | S:N679K | 0.801995 | 0  | 1   | 0.370498 | 1 | [[3.34166667e+02 6.68333333e+01] [8.33333333e-01 1.66666667e-01]] |
| <b>86</b> | S:P681H | 1.044258 | 46 | 253 | 0.306833 | 1 | [[ 85.83333333 17.16666667] [249.16666667 49.83333333]]           |
| <b>87</b> | S:P681R | 0.050503 | 0  | 4   | 0.822191 | 1 | [[331.66666667 66.33333333] [ 3.33333333 0.66666667]]             |
| <b>88</b> | S:A688V | 0.1005   | 0  | 2   | 0.75123  | 1 | [[333.33333333 66.66666667] [ 1.66666667 0.33333333]]             |
| <b>89</b> | S:A701V | 10.80182 | 13 | 21  | 0.001014 | 1 | [[306.66666667 61.33333333] [ 28.33333333 5.66666667]]            |
| <b>90</b> | S:E702D | 0.801995 | 0  | 1   | 0.370498 | 1 | [[3.34166667e+02 6.68333333e+01] [8.33333333e-01 1.66666667e-01]] |
| <b>91</b> | S:T716I | 0.423026 | 46 | 246 | 0.515431 | 1 | [[ 91.66666667 18.33333333] [243.33333333 48.66666667]]           |
| <b>92</b> | S:T732A | 0.1005   | 0  | 2   | 0.75123  | 1 | [[333.33333333 66.66666667] [ 1.66666667 0.33333333]]             |
| <b>93</b> | S:S735A | 0.1005   | 0  | 2   | 0.75123  | 1 | [[333.33333333 66.66666667] [ 1.66666667 0.33333333]]             |

|            |          |          |    |     |          |   |                                                               |
|------------|----------|----------|----|-----|----------|---|---------------------------------------------------------------|
| <b>94</b>  | S:G769V  | 0        | 0  | 3   | 1        | 1 | [[332.5 66.5] [ 2.5 0.5]]                                     |
| <b>95</b>  | S:T791I  | 0.1005   | 0  | 2   | 0.75123  | 1 | [[333.33333333 66.66666667] [ 1.66666667 0.33333333]]         |
| <b>96</b>  | S:D796H  | 0.801995 | 0  | 1   | 0.370498 | 1 | [[3.34166667e+02 6.68333333e+01] [8.33333333e-01 1.66666667e- |
| <b>97</b>  | S:P812L  | 0.801995 | 0  | 1   | 0.370498 | 1 | [[3.34166667e+02 6.68333333e+01] [8.33333333e-01 1.66666667e- |
| <b>98</b>  | S:P812S  | 0.801995 | 0  | 1   | 0.370498 | 1 | [[3.34166667e+02 6.68333333e+01] [8.33333333e-01 1.66666667e- |
| <b>99</b>  | S:A845S  | 0.801995 | 0  | 1   | 0.370498 | 1 | [[3.34166667e+02 6.68333333e+01] [8.33333333e-01 1.66666667e- |
| <b>100</b> | S:A846S  | 0.801995 | 0  | 1   | 0.370498 | 1 | [[3.34166667e+02 6.68333333e+01] [8.33333333e-01 1.66666667e- |
| <b>101</b> | S:A846V  | 0.801995 | 0  | 1   | 0.370498 | 1 | [[3.34166667e+02 6.68333333e+01] [8.33333333e-01 1.66666667e- |
| <b>102</b> | S:T859N  | 2.881422 | 2  | 35  | 0.089607 | 1 | [[304.16666667 60.83333333] [ 30.83333333 6.16666667]]        |
| <b>103</b> | S:F888L  | 0        | 0  | 3   | 1        | 1 | [[332.5 66.5] [ 2.5 0.5]]                                     |
| <b>104</b> | S:D936N  | 0.801995 | 0  | 1   | 0.370498 | 1 | [[3.34166667e+02 6.68333333e+01] [8.33333333e-01 1.66666667e- |
| <b>105</b> | S:S939F  | 0.1005   | 0  | 2   | 0.75123  | 1 | [[333.33333333 66.66666667] [ 1.66666667 0.33333333]]         |
| <b>106</b> | S:D950H  | 2.690984 | 2  | 34  | 0.100918 | 1 | [[305. 61.] [ 30. 6.]]                                        |
| <b>107</b> | S:D950N  | 0.801995 | 0  | 1   | 0.370498 | 1 | [[3.34166667e+02 6.68333333e+01] [8.33333333e-01 1.66666667e- |
| <b>108</b> | S:Q957R  | 0.801995 | 0  | 1   | 0.370498 | 1 | [[3.34166667e+02 6.68333333e+01] [8.33333333e-01 1.66666667e- |
| <b>109</b> | S:T961M  | 0.801995 | 0  | 1   | 0.370498 | 1 | [[3.34166667e+02 6.68333333e+01] [8.33333333e-01 1.66666667e- |
| <b>110</b> | S:S982A  | 1.079934 | 44 | 244 | 0.298712 | 1 | [[ 95. 19.] [240. 48.]]                                       |
| <b>111</b> | S:A1020S | 0.801995 | 0  | 1   | 0.370498 | 1 | [[3.34166667e+02 6.68333333e+01] [8.33333333e-01 1.66666667e- |
| <b>112</b> | S:T1027I | 0.818321 | 3  | 6   | 0.365672 | 1 | [[327.5 65.5] [ 7.5 1.5]]                                     |
| <b>113</b> | S:V1060I | 0.801995 | 0  | 1   | 0.370498 | 1 | [[3.34166667e+02 6.68333333e+01] [8.33333333e-01 1.66666667e- |
| <b>114</b> | S:A1087S | 0.801995 | 0  | 1   | 0.370498 | 1 | [[3.34166667e+02 6.68333333e+01] [8.33333333e-01 1.66666667e- |
| <b>115</b> | S:H1101Q | 0.801995 | 0  | 1   | 0.370498 | 1 | [[3.34166667e+02 6.68333333e+01] [8.33333333e-01 1.66666667e- |
| <b>116</b> | S:D1118H | 0.903624 | 45 | 247 | 0.341812 | 1 | [[ 91.66666667 18.33333333] [243.33333333 48.66666667]]       |
| <b>117</b> | S:G1167V | 0.801995 | 0  | 1   | 0.370498 | 1 | [[3.34166667e+02 6.68333333e+01] [8.33333333e-01 1.66666667e- |
| <b>118</b> | S:D1168G | 0.801995 | 0  | 1   | 0.370498 | 1 | [[3.34166667e+02 6.68333333e+01] [8.33333333e-01 1.66666667e- |
| <b>119</b> | S:V1176F | 0.64806  | 2  | 3   | 0.420807 | 1 | [[330.83333333 66.16666667] [ 4.16666667 0.83333333]]         |
| <b>120</b> | S:K1191N | 0        | 2  | 13  | 1        | 1 | [[322.5 64.5] [ 12.5 2.5]]                                    |
| <b>121</b> | S:G1219V | 1.005    | 0  | 10  | 0.316104 | 1 | [[326.66666667 65.33333333] [ 8.33333333 1.66666667]]         |
| <b>122</b> | S:M1237I | 0.801995 | 0  | 1   | 0.370498 | 1 | [[3.34166667e+02 6.68333333e+01] [8.33333333e-01 1.66666667e- |
| <b>123</b> | S:C1243F | 0.801995 | 0  | 1   | 0.370498 | 1 | [[3.34166667e+02 6.68333333e+01] [8.33333333e-01 1.66666667e- |
| <b>124</b> | S:V1264L | 0.1005   | 1  | 1   | 0.75123  | 1 | [[333.33333333 66.66666667] [ 1.66666667 0.33333333]]         |
| <b>125</b> | S:K1266N | 0.801995 | 0  | 1   | 0.370498 | 1 | [[3.34166667e+02 6.68333333e+01] [8.33333333e-01 1.66666667e- |

01]]

01]]  
01]]

01]]

01]]  
01]]

01]]

01]]

01]]

01]]

01]]

01]]

01]]

01]]

01]]  
01]]

01]]

01]]  
01]]  
01]]  
01]]  
01]]

01]]

01]]

01]]  
01]]  
01]]  
01]]  
01]]  
01]]

01]]

01]]  
01]]  
01]]

01]]

01]]  
01]]  
01]]

01]]  
01]]

01]]  
01]]

01]]
